# Supplementary material
Source: PubMed Central journal article supplement (PMC5657559)

EphB2-EcadhGFP  
Empty-EcadhGFP  
ephrinB1-EcadhCherry

a

120kDa --

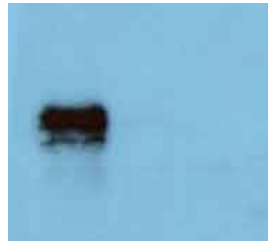

anti-EphB2

50kDa --

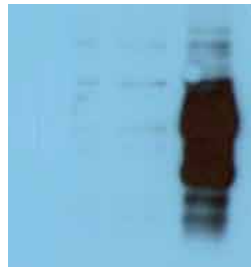

anti-ephrinB1

b

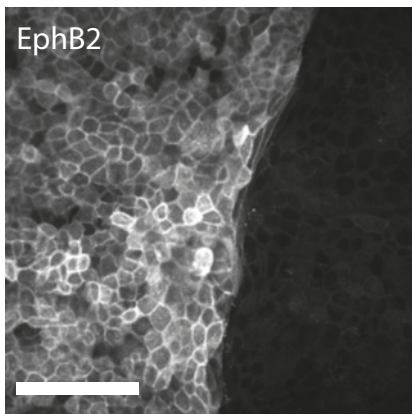

d

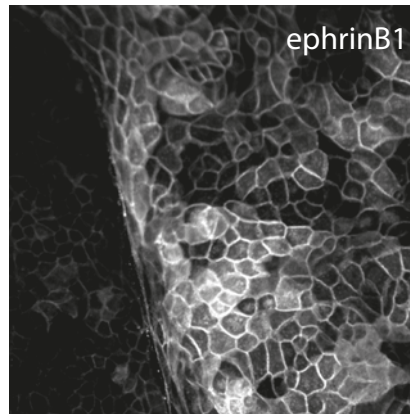

c

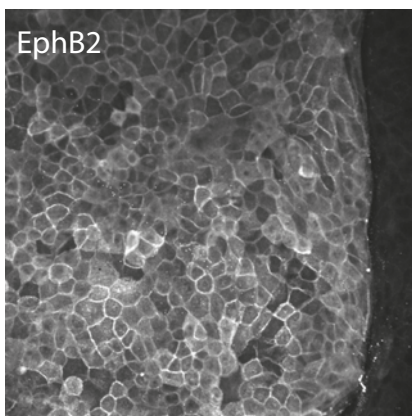

e

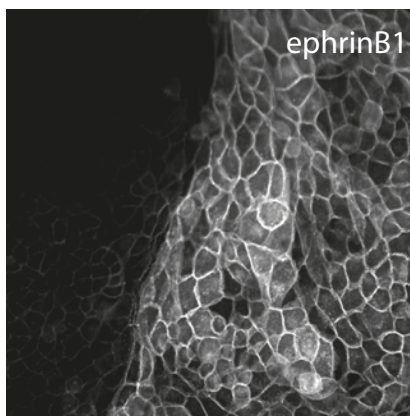

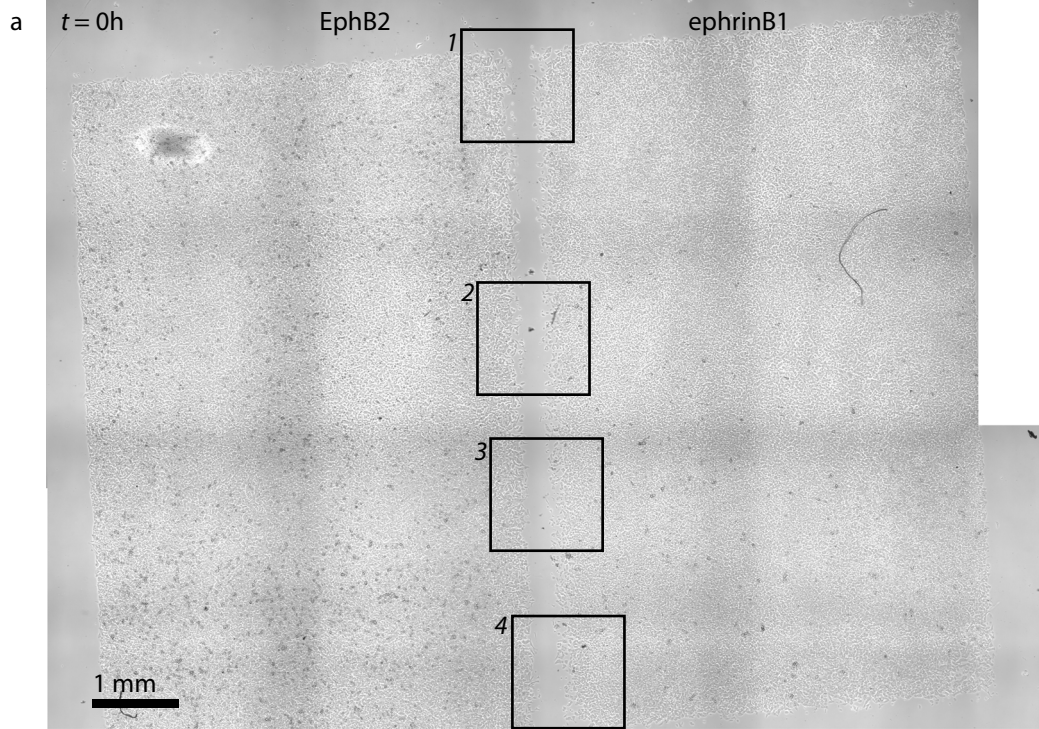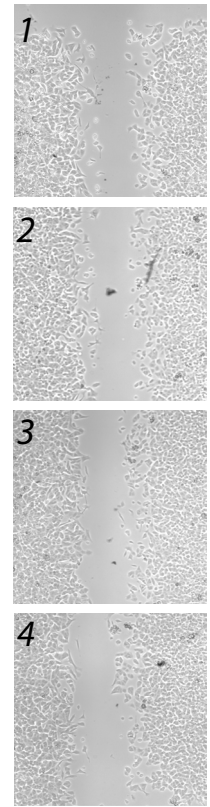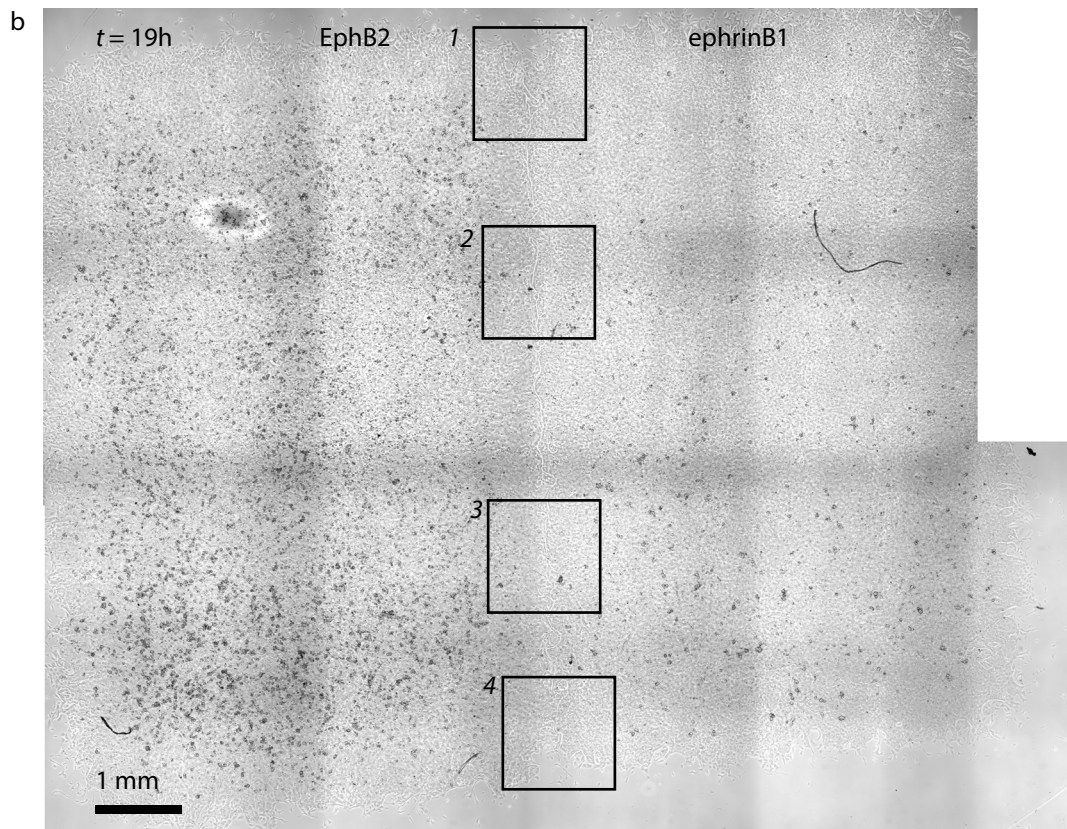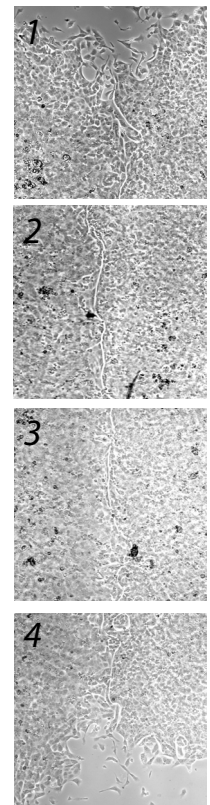

a

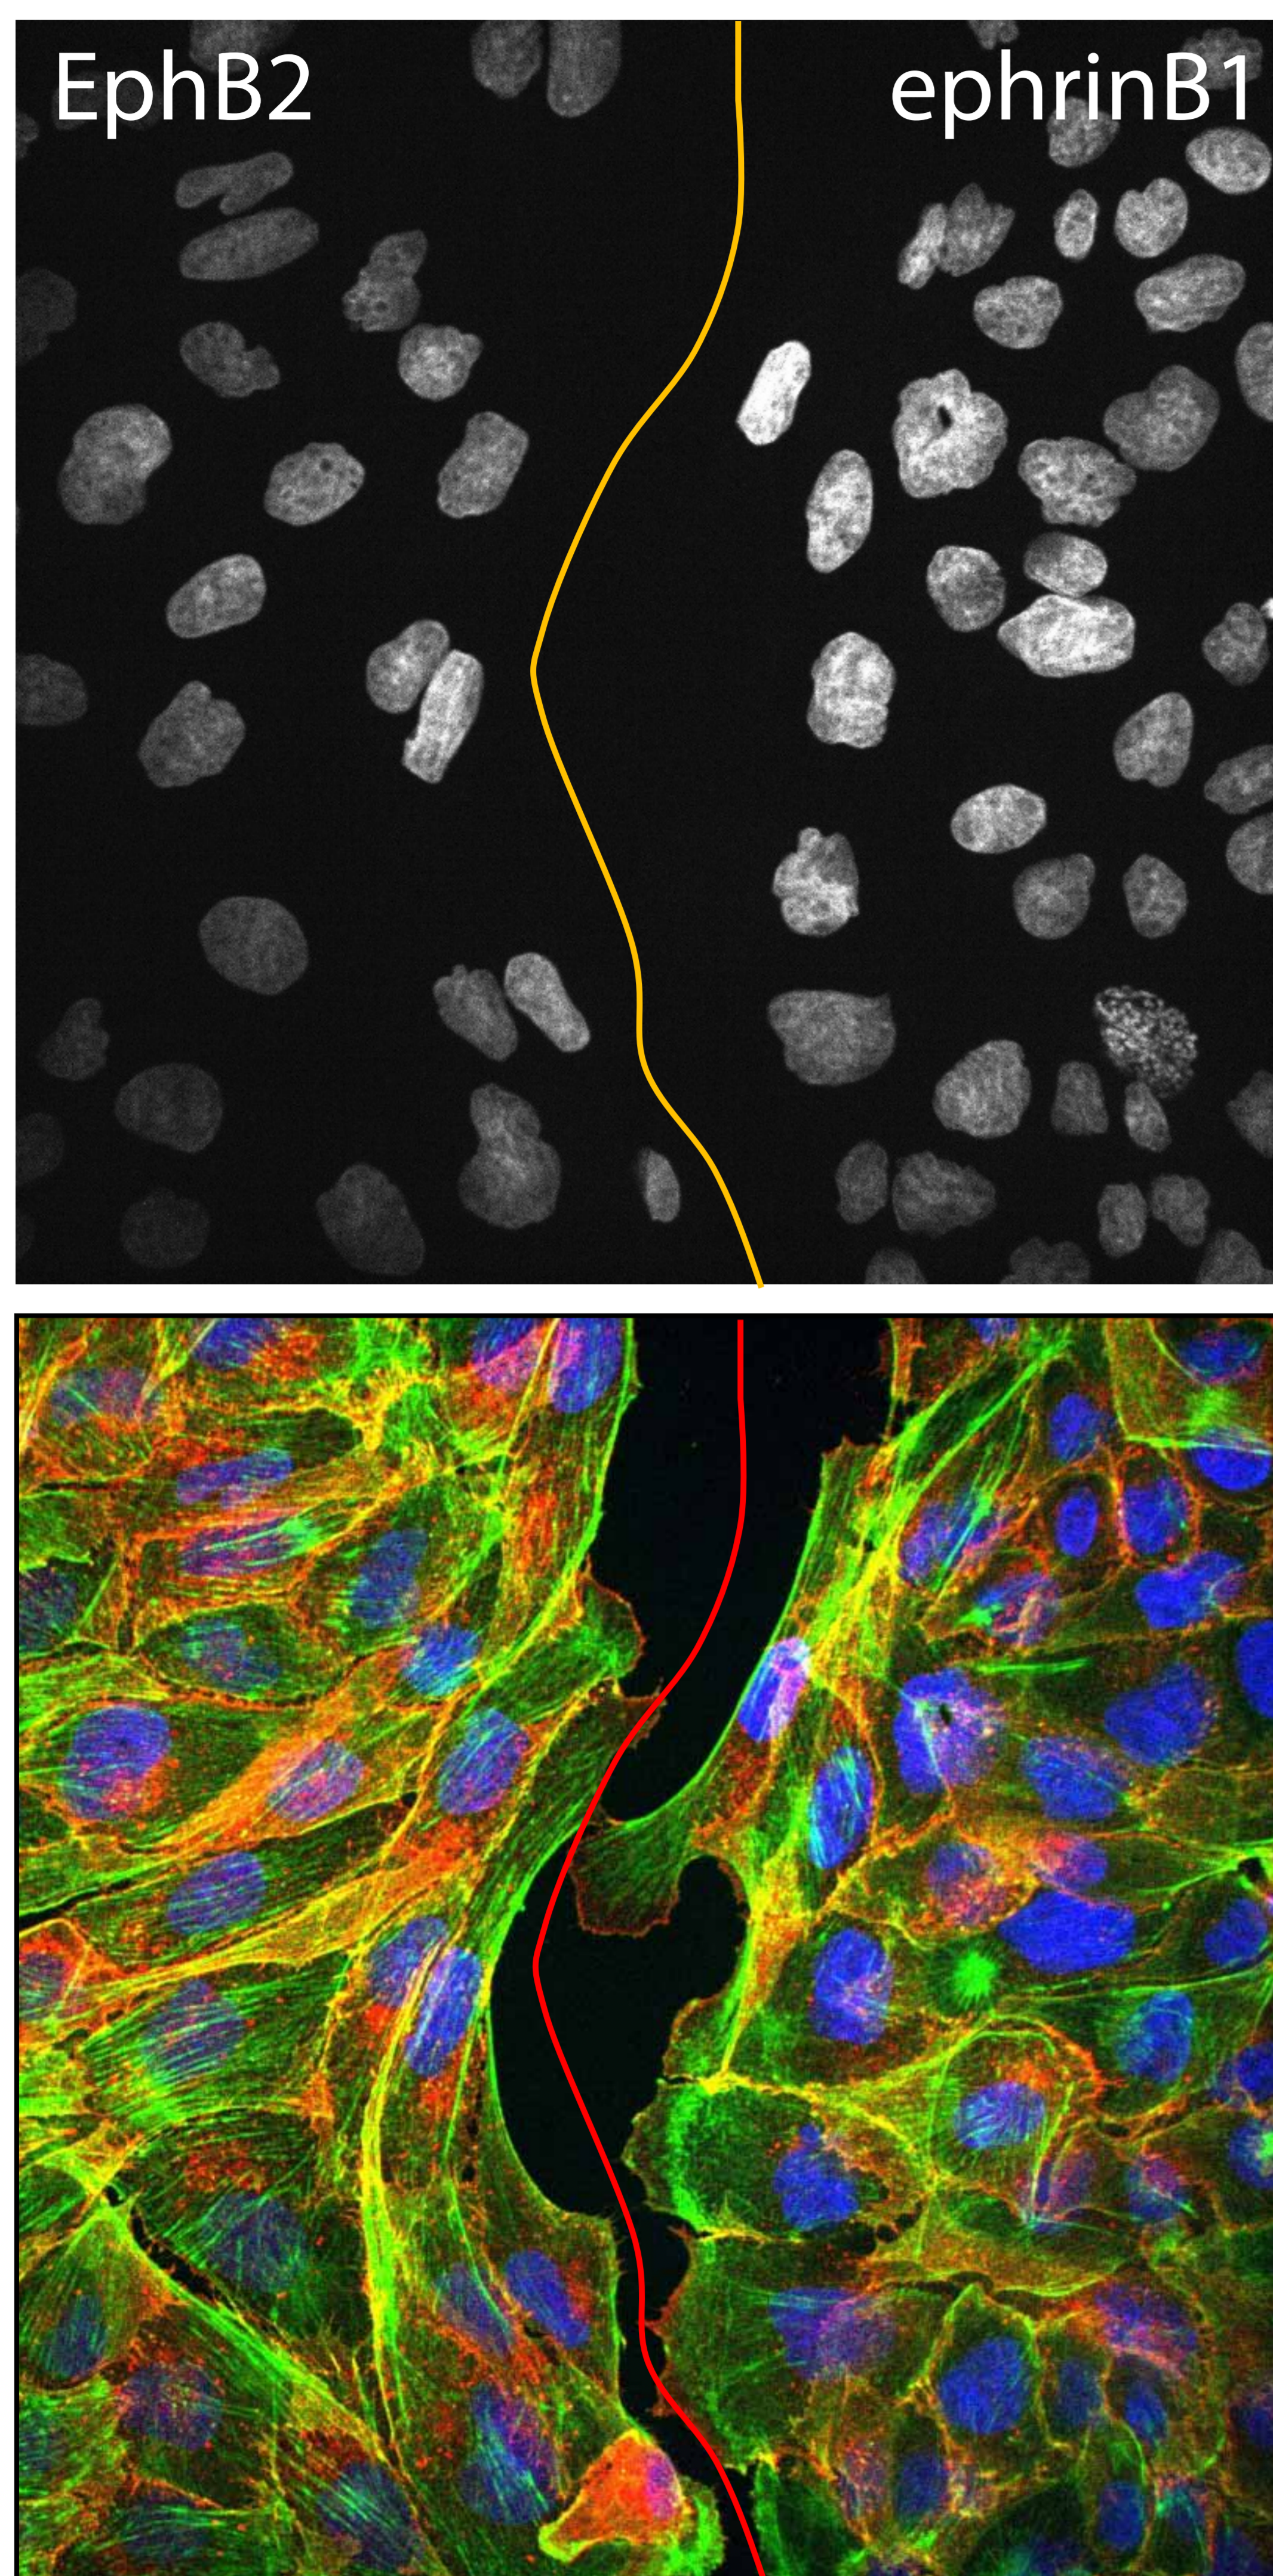

b

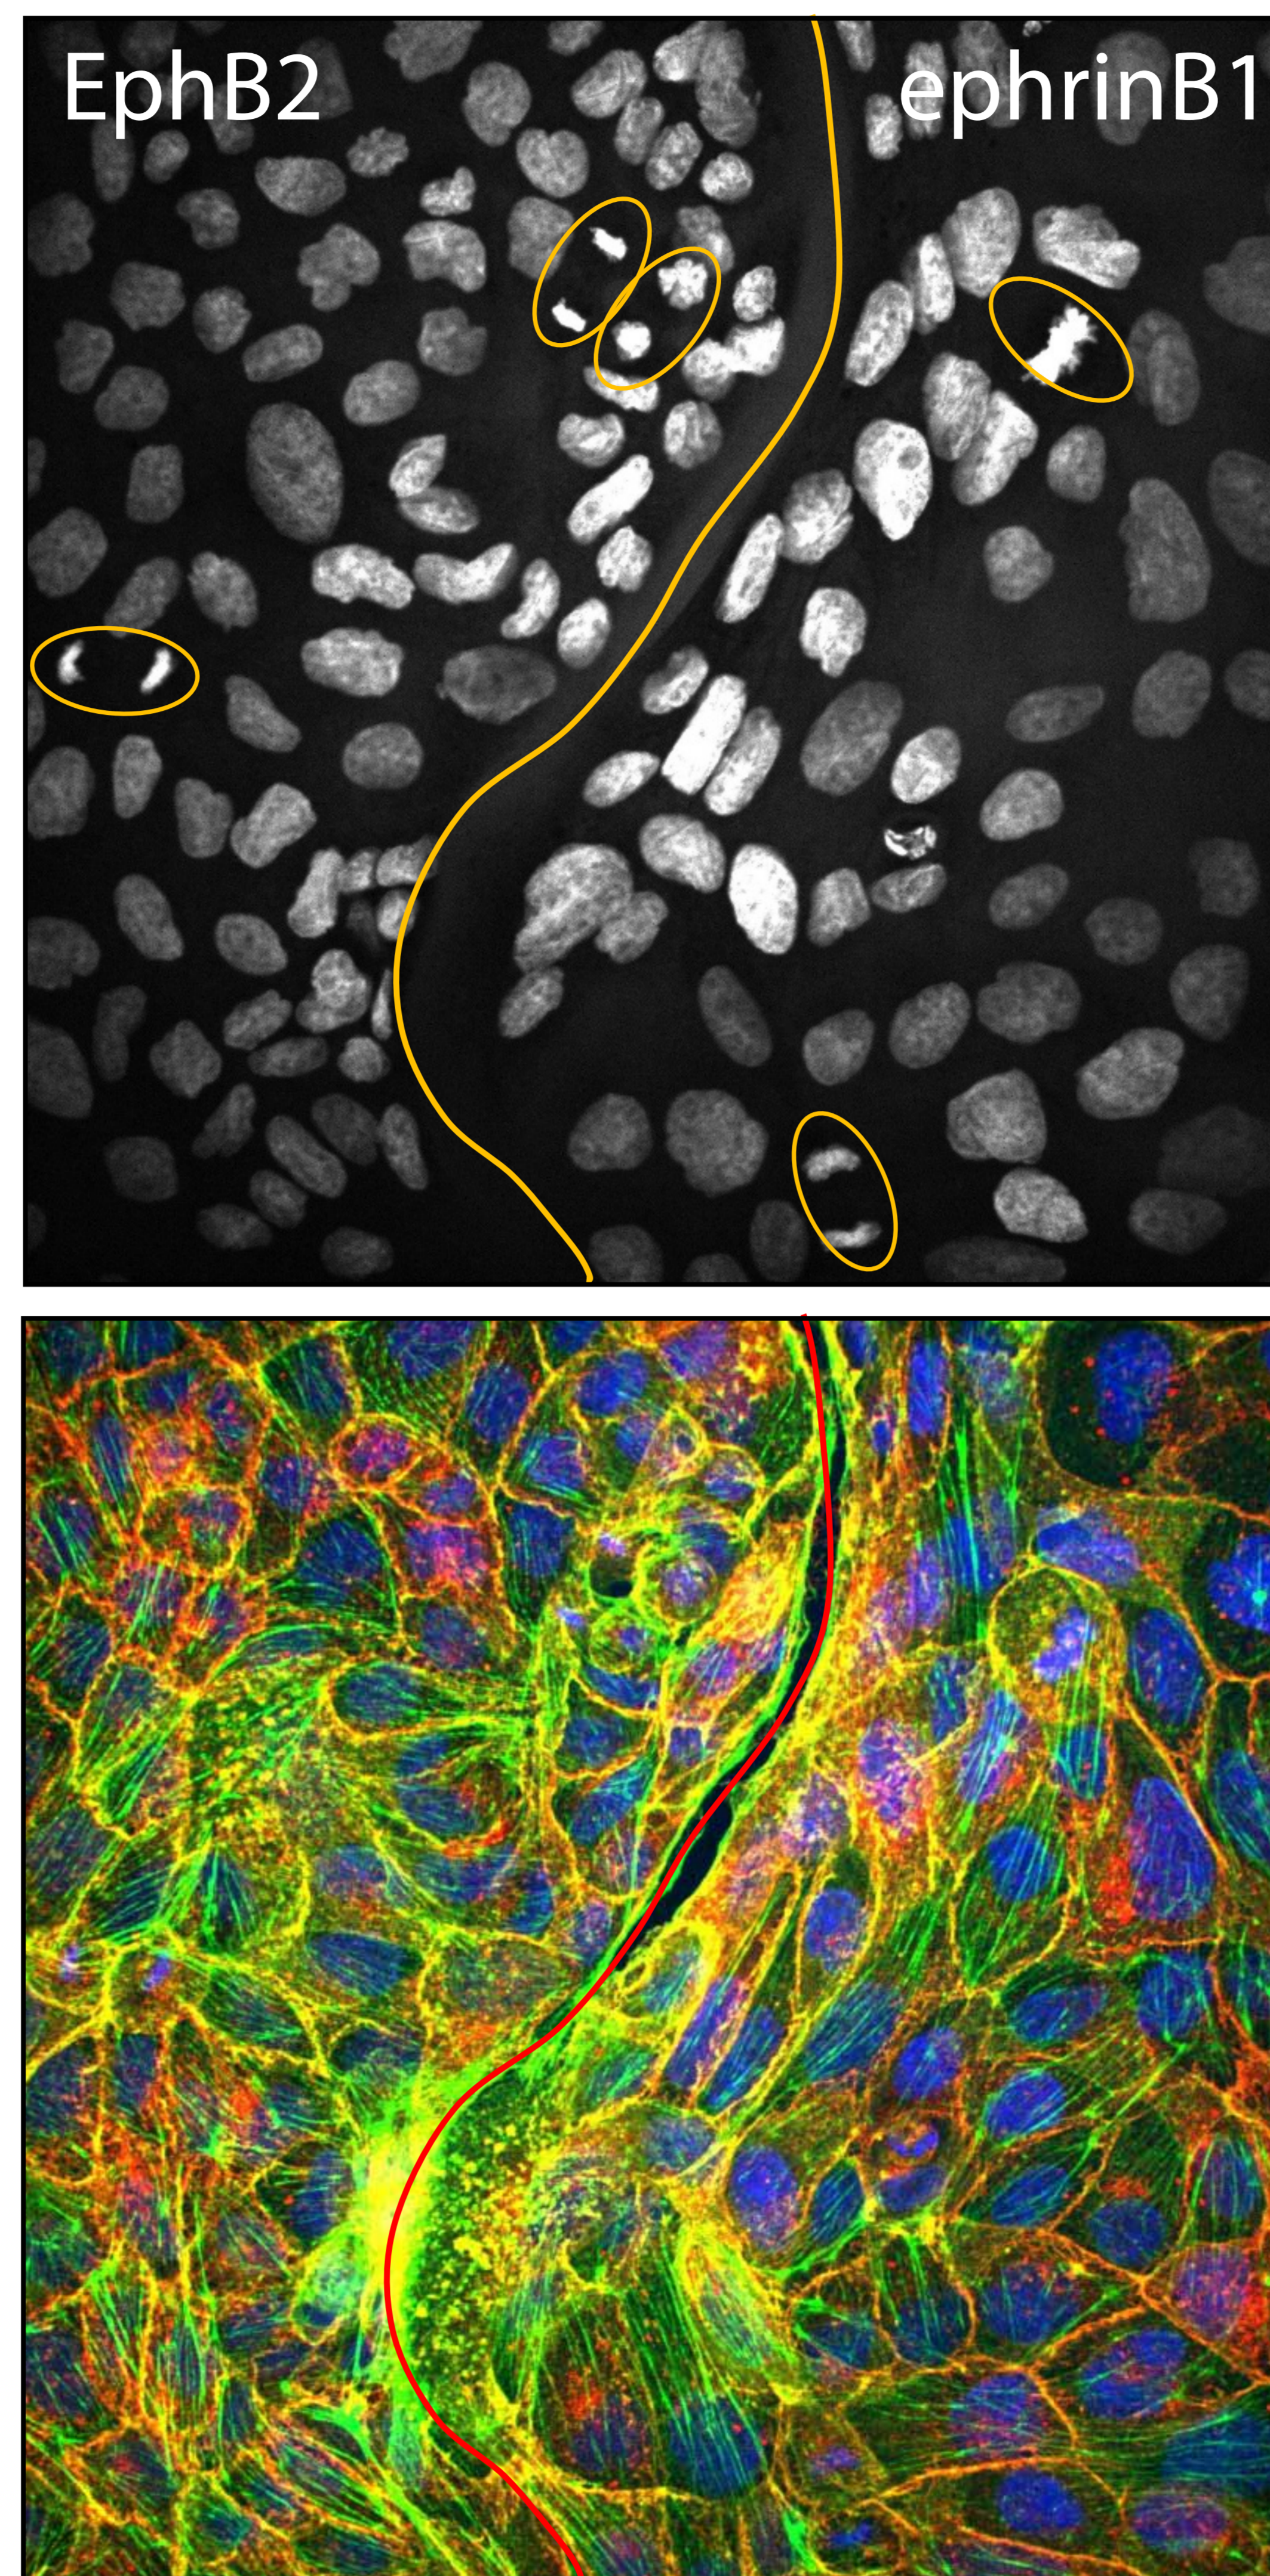

c

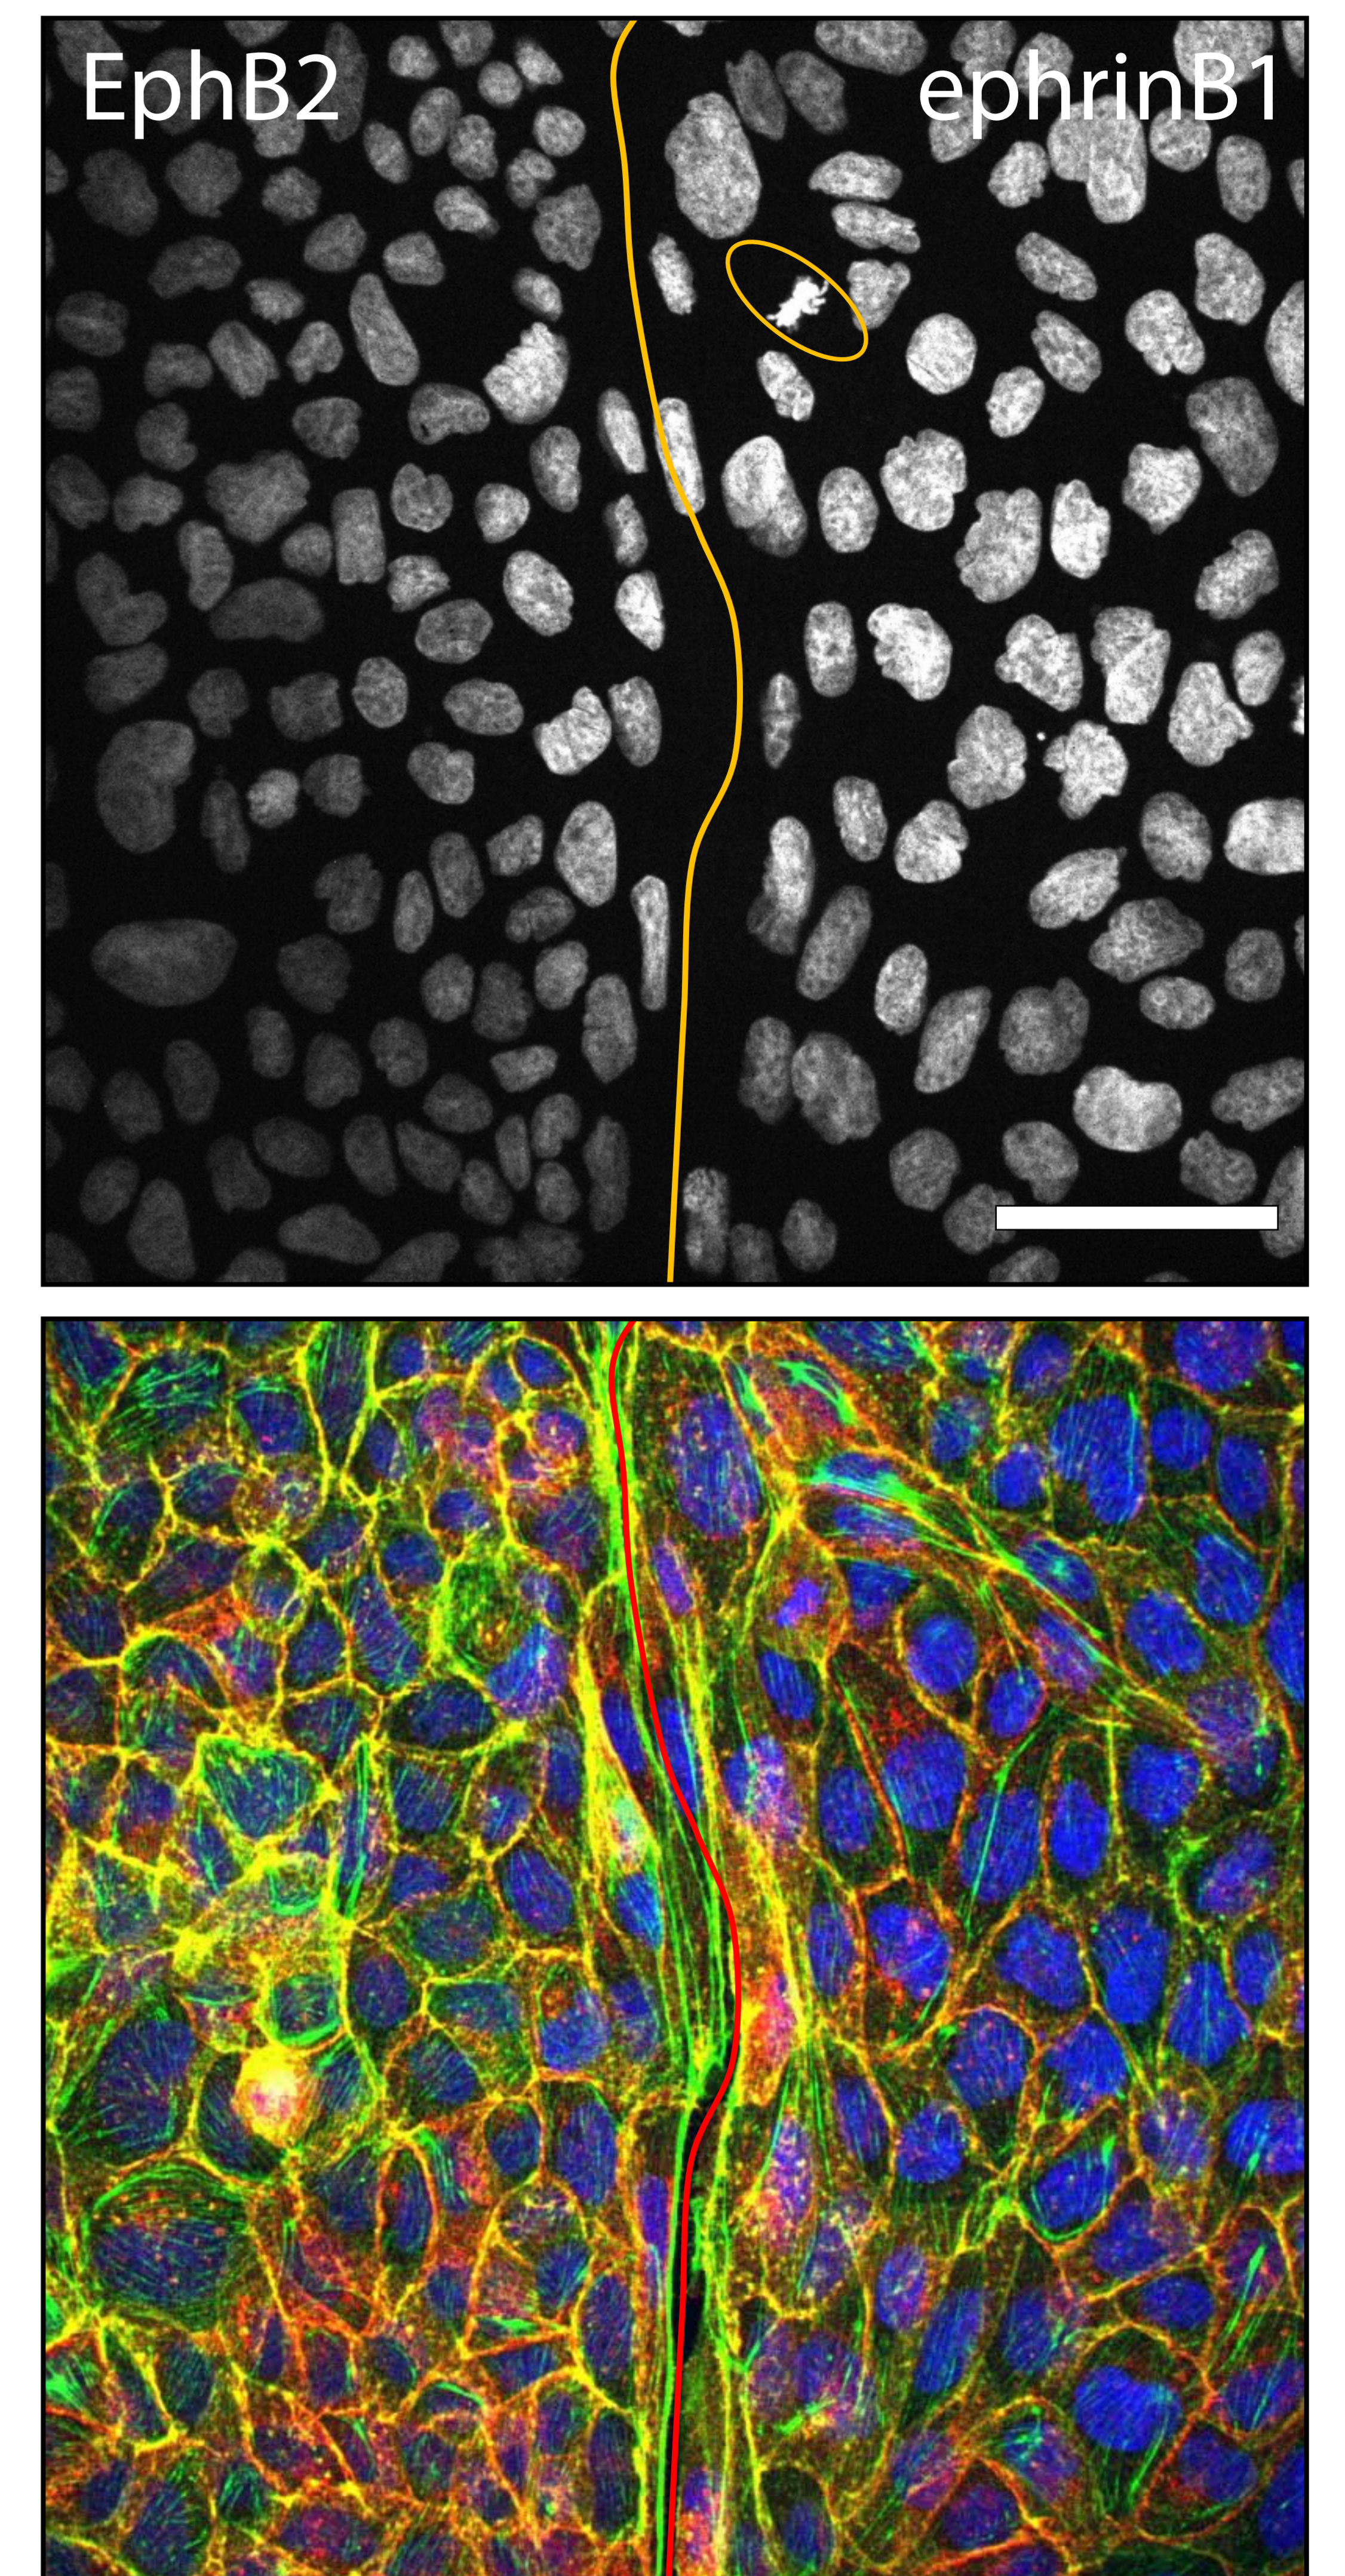

d

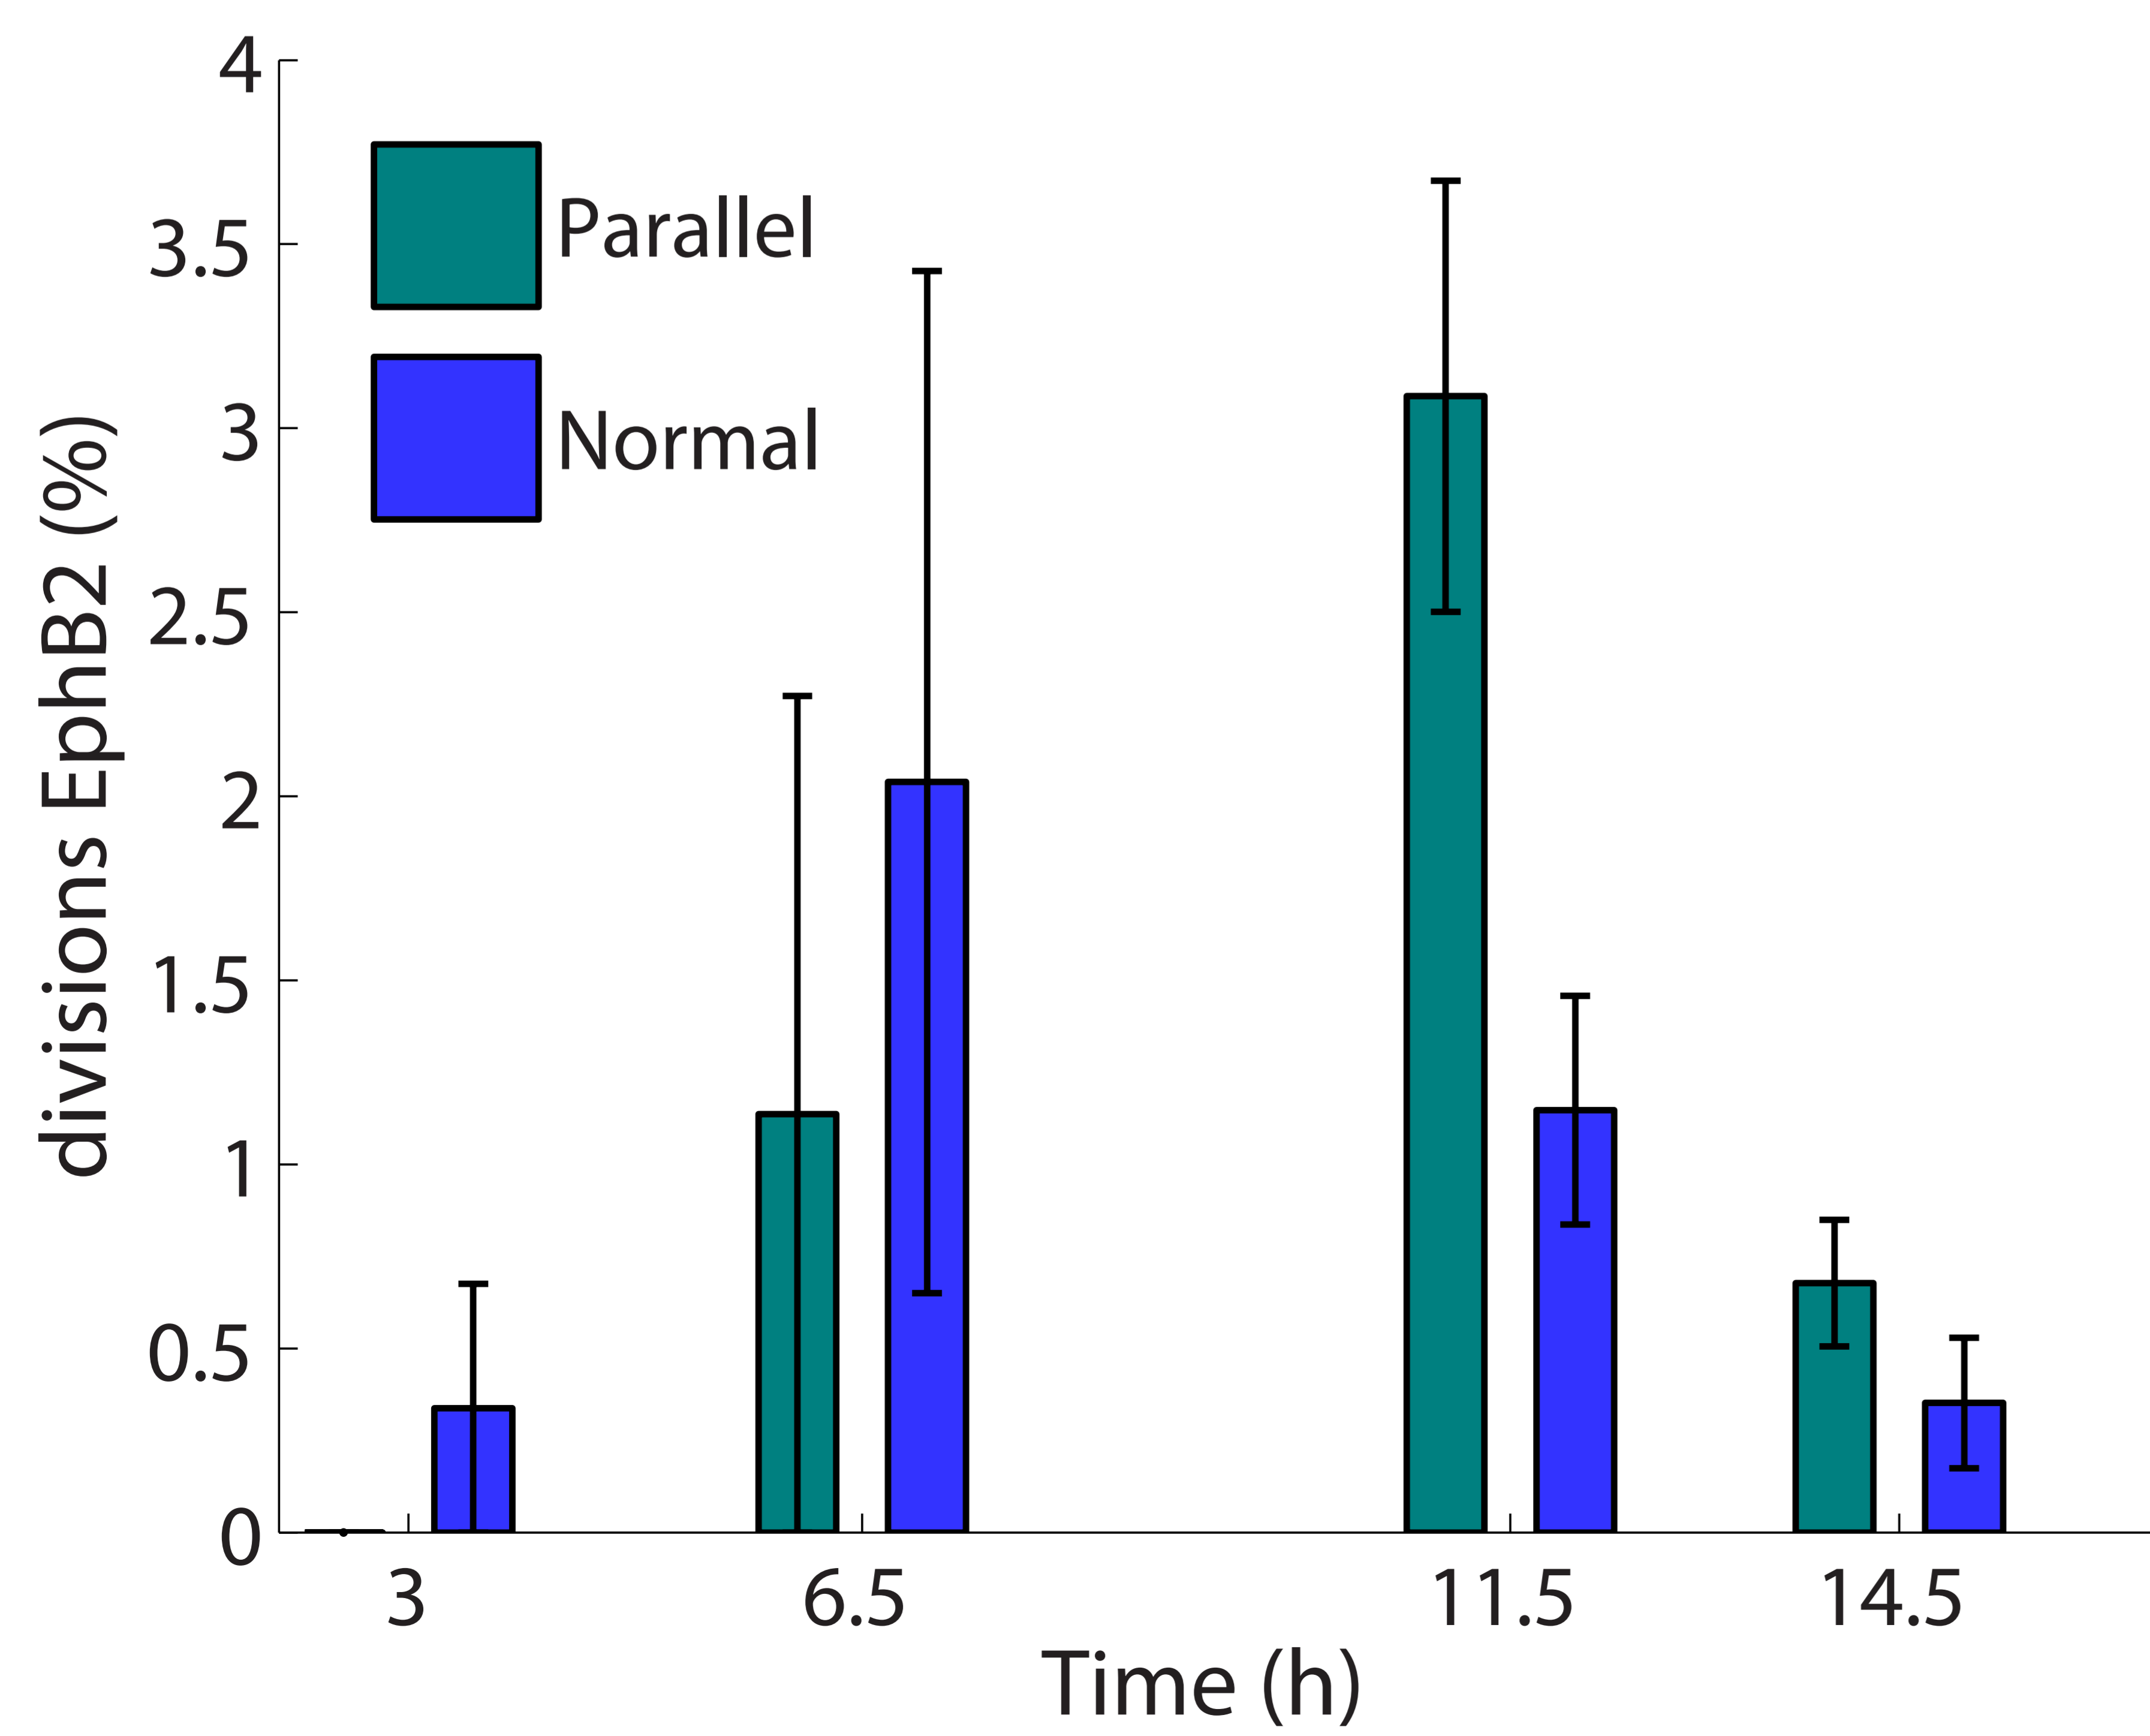

e

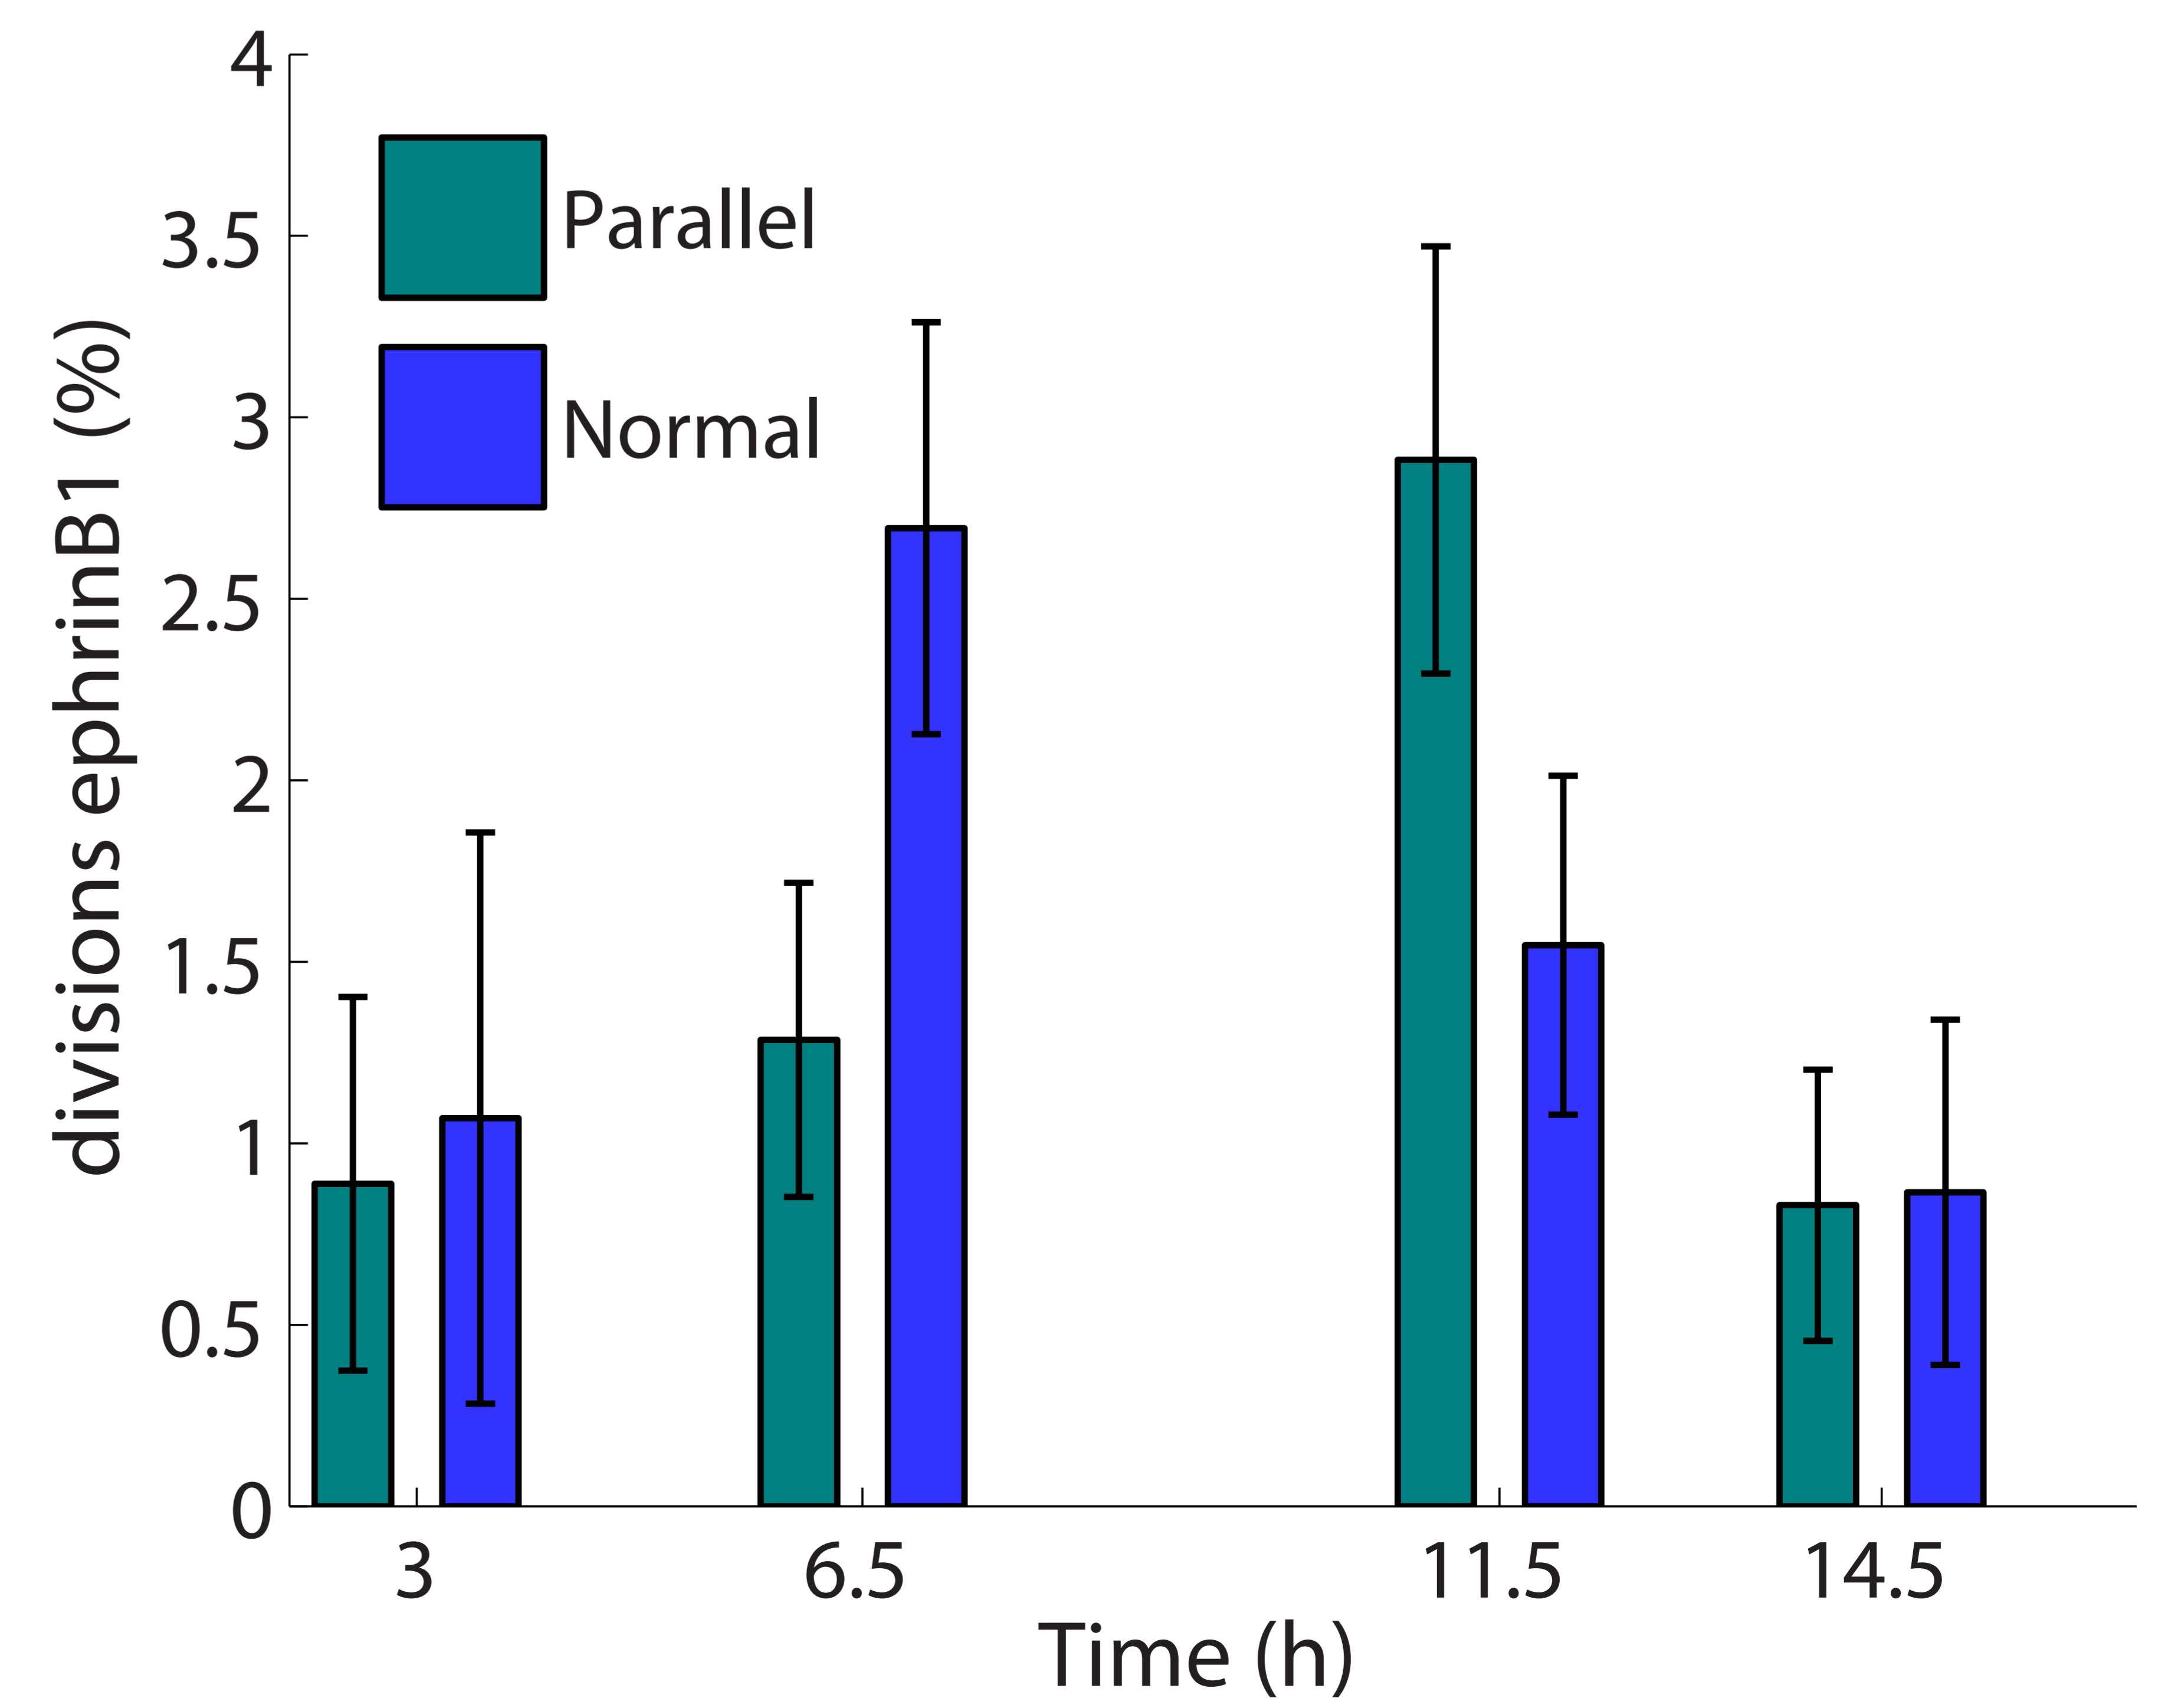

$T_{\perp}$ 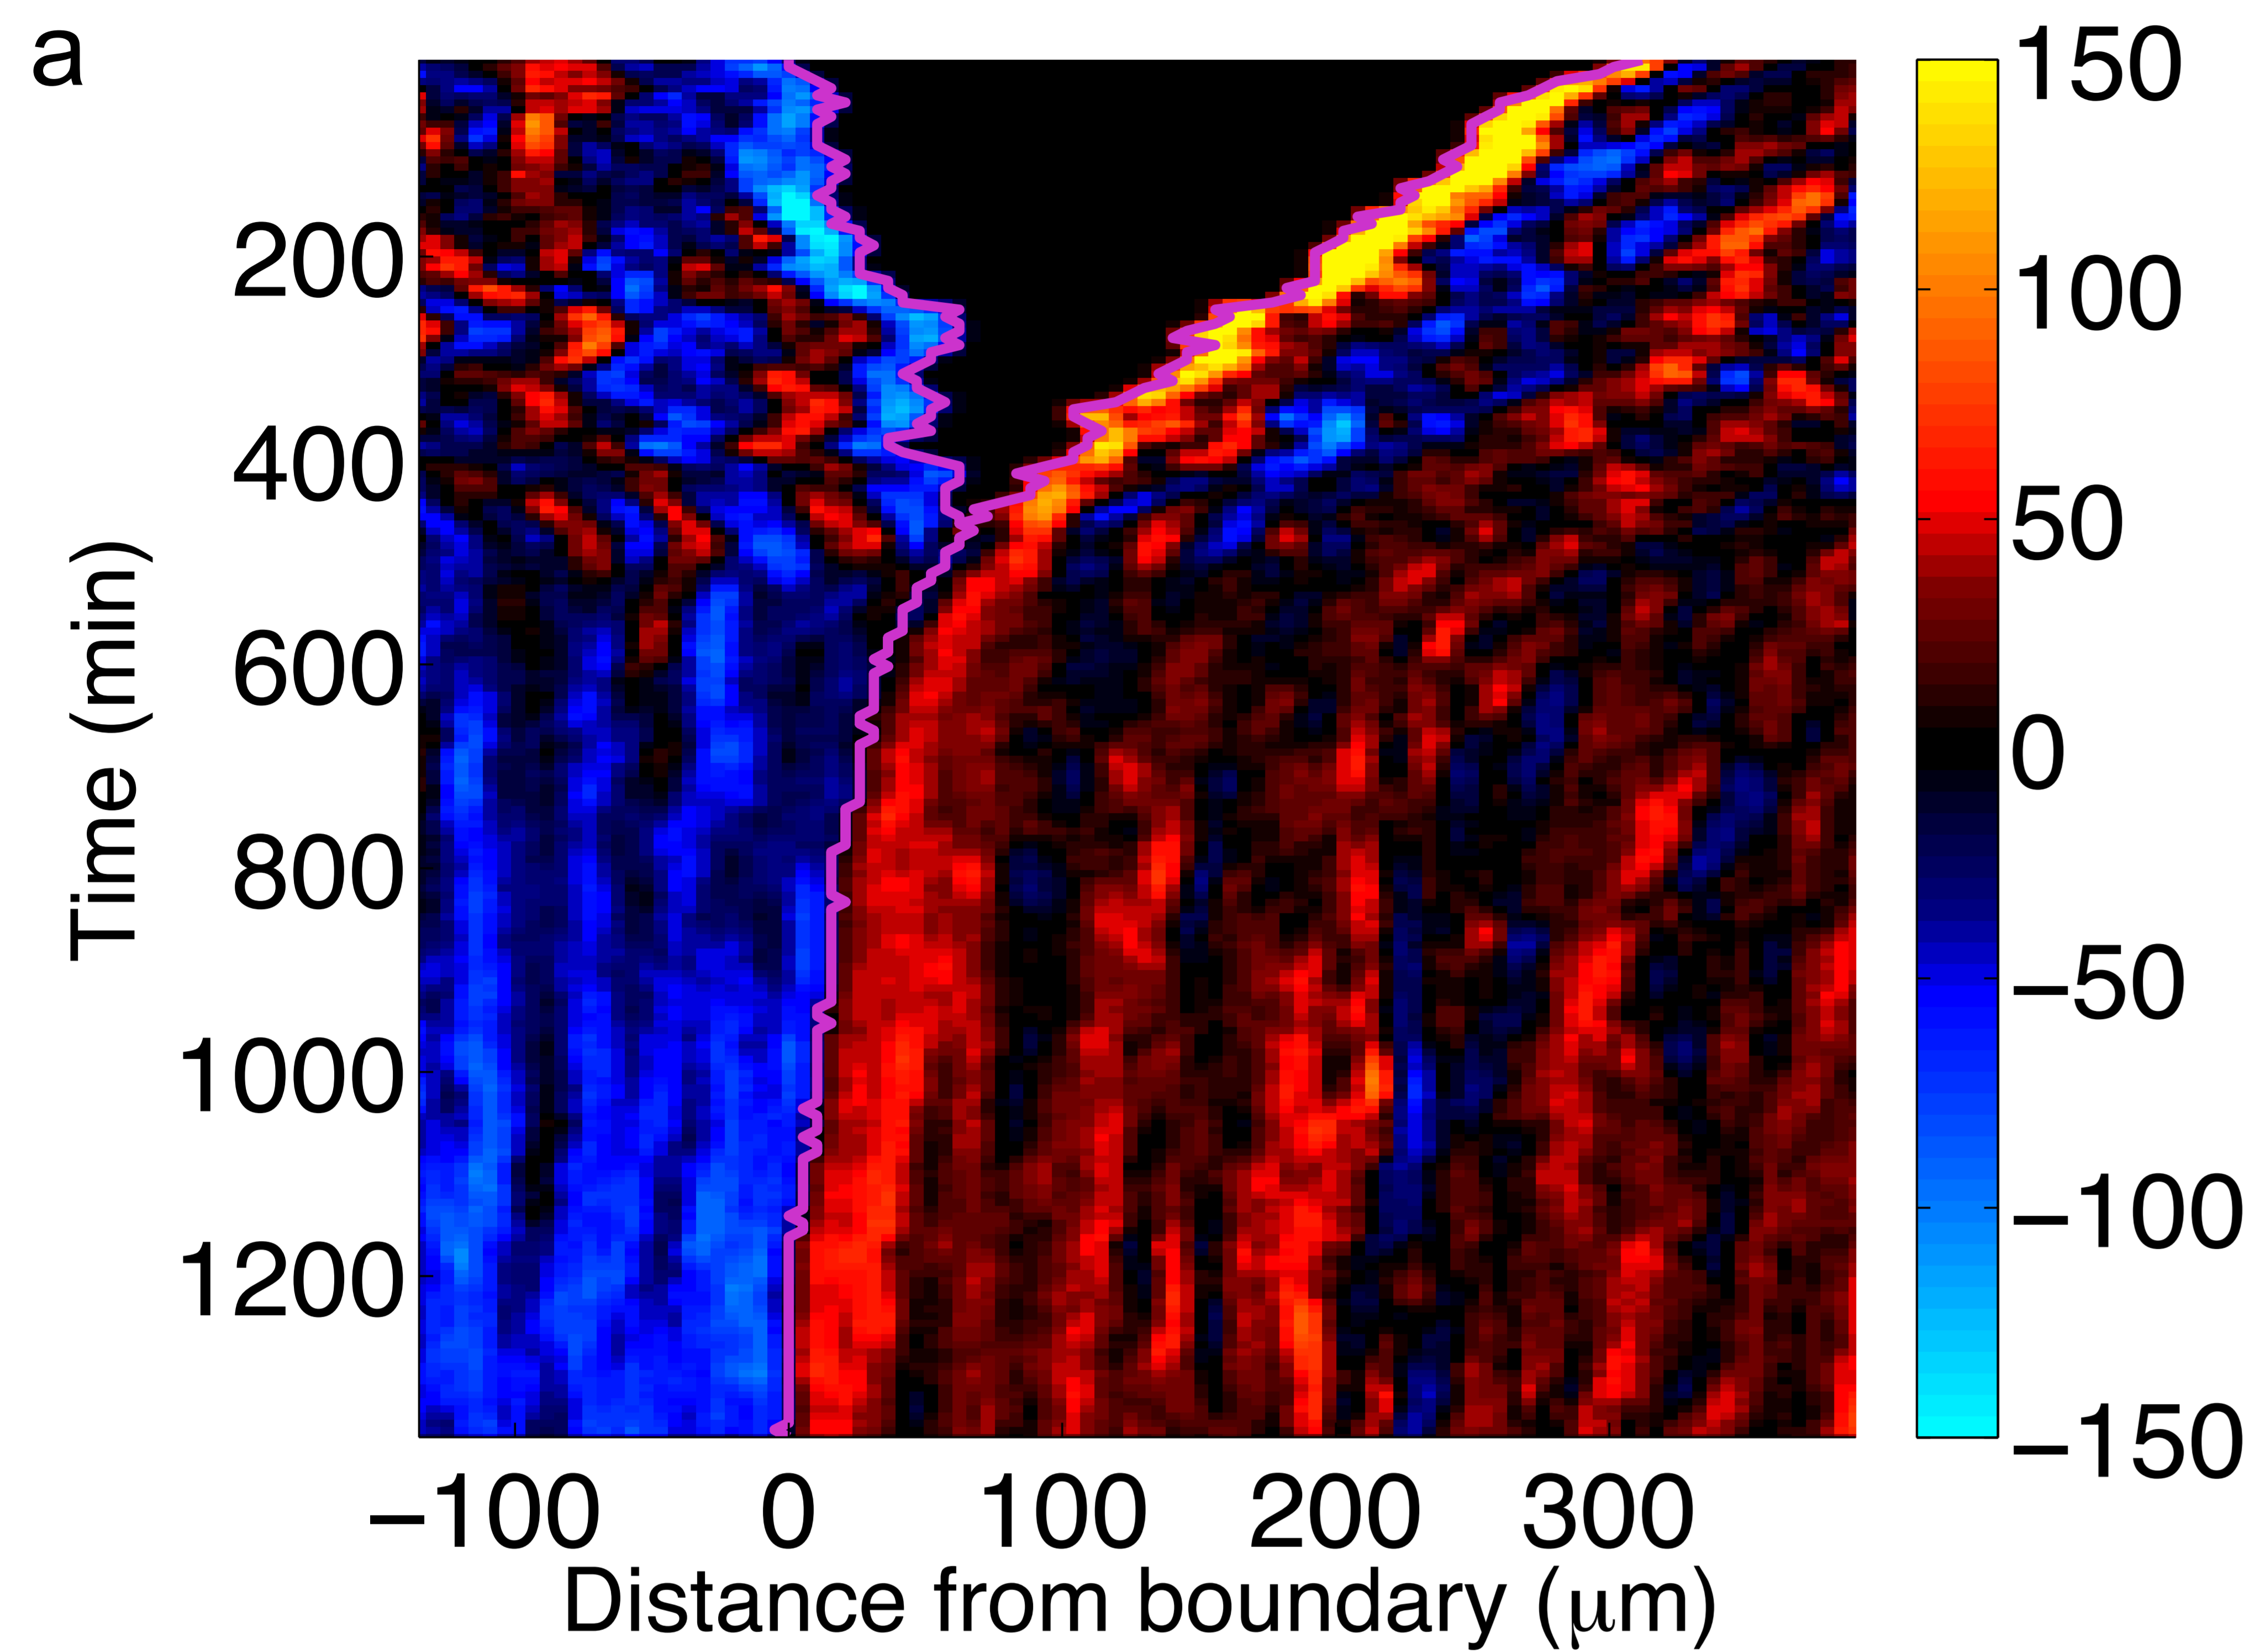 $\sigma_{\perp}$ 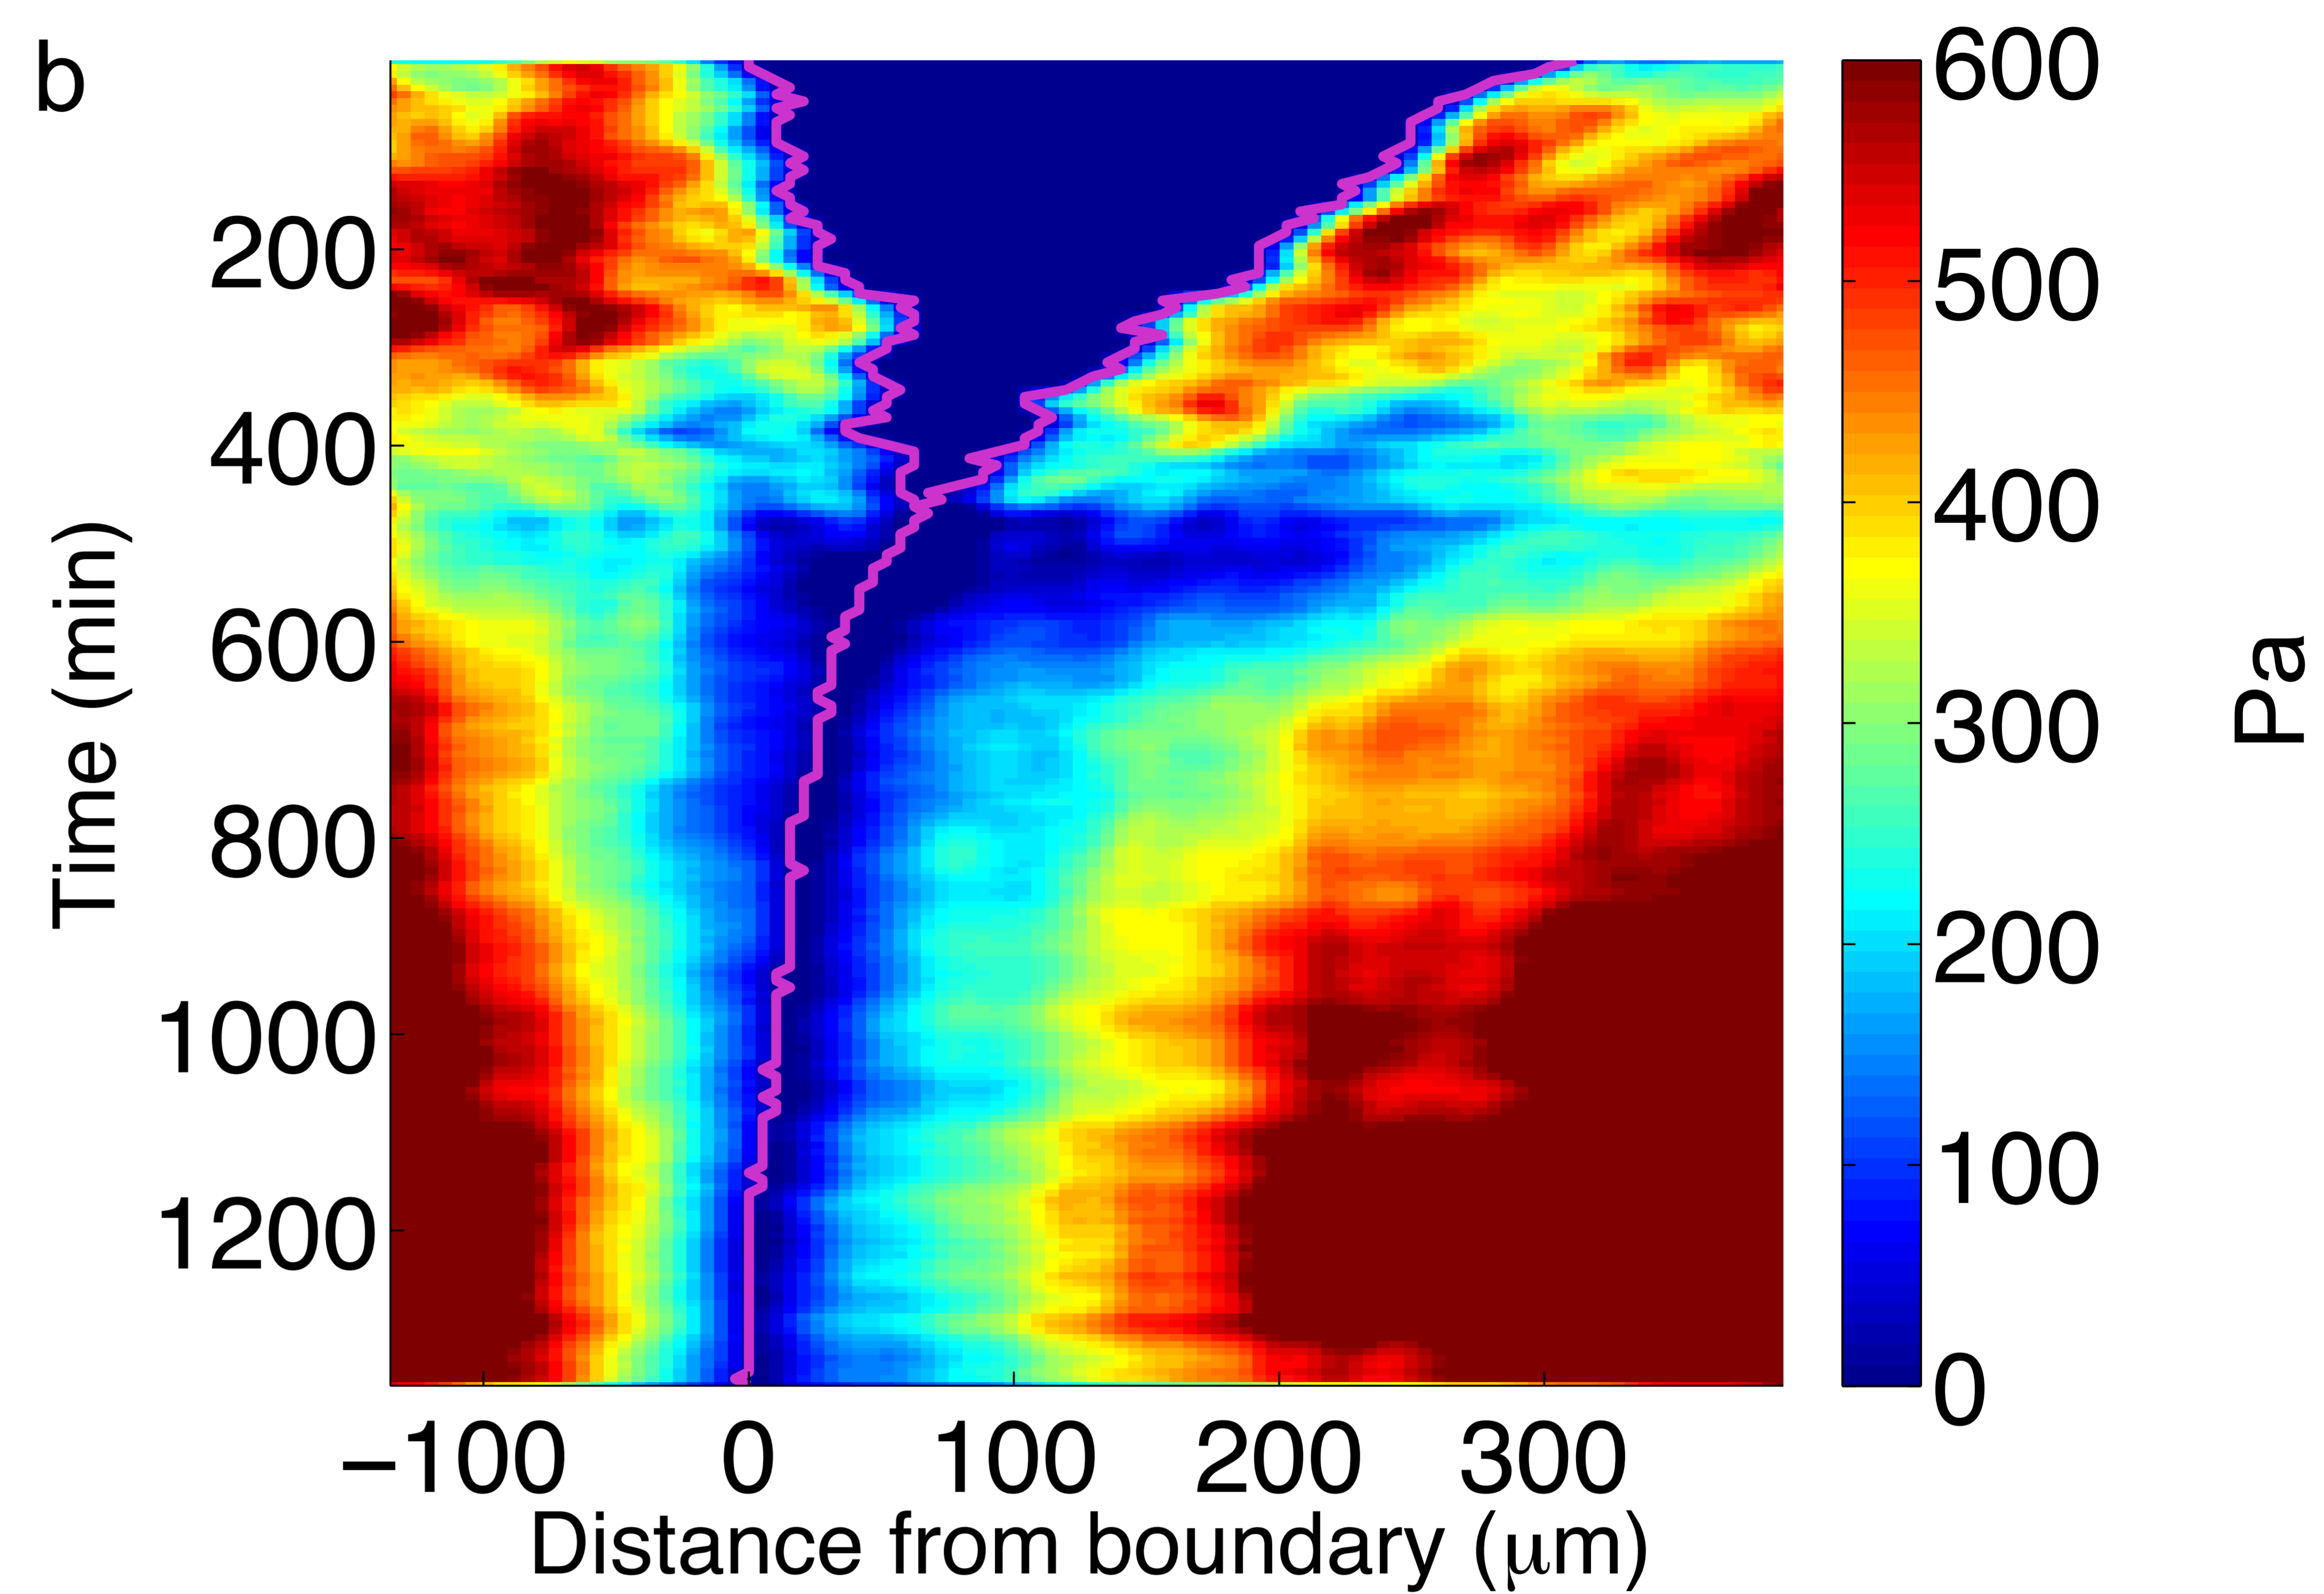 $V_{\perp}$ 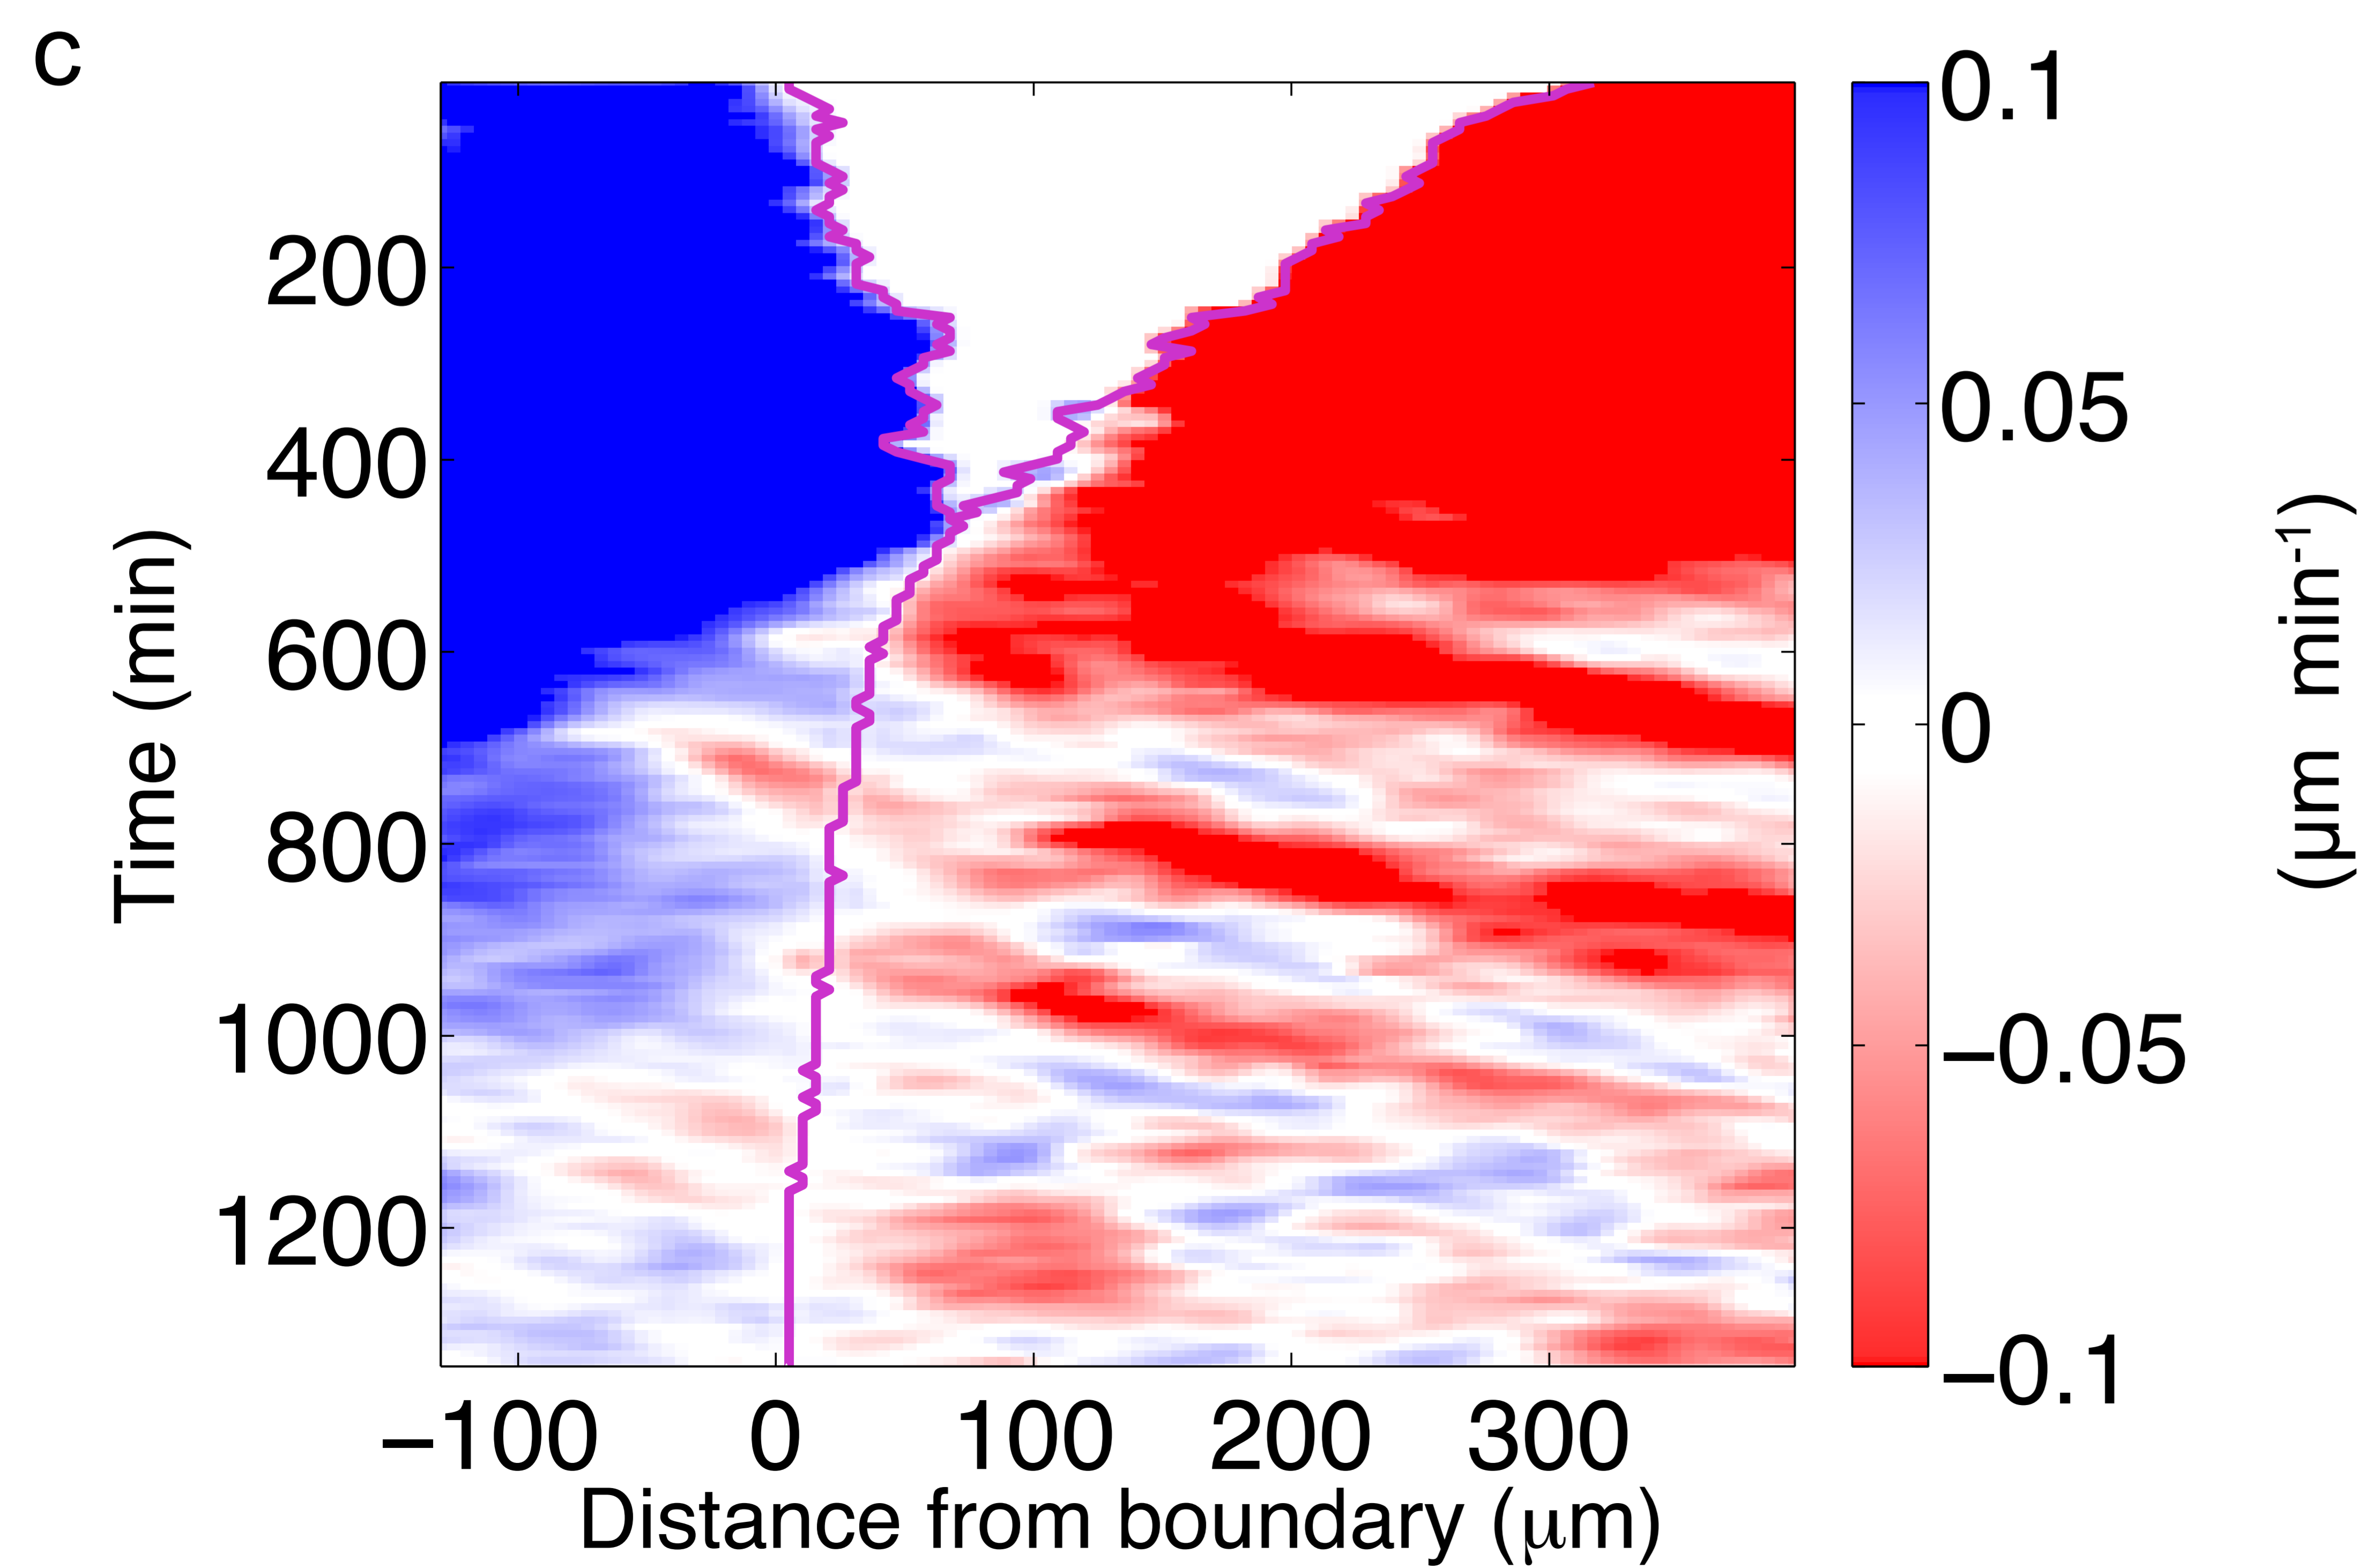 $C_{vv\perp}$ 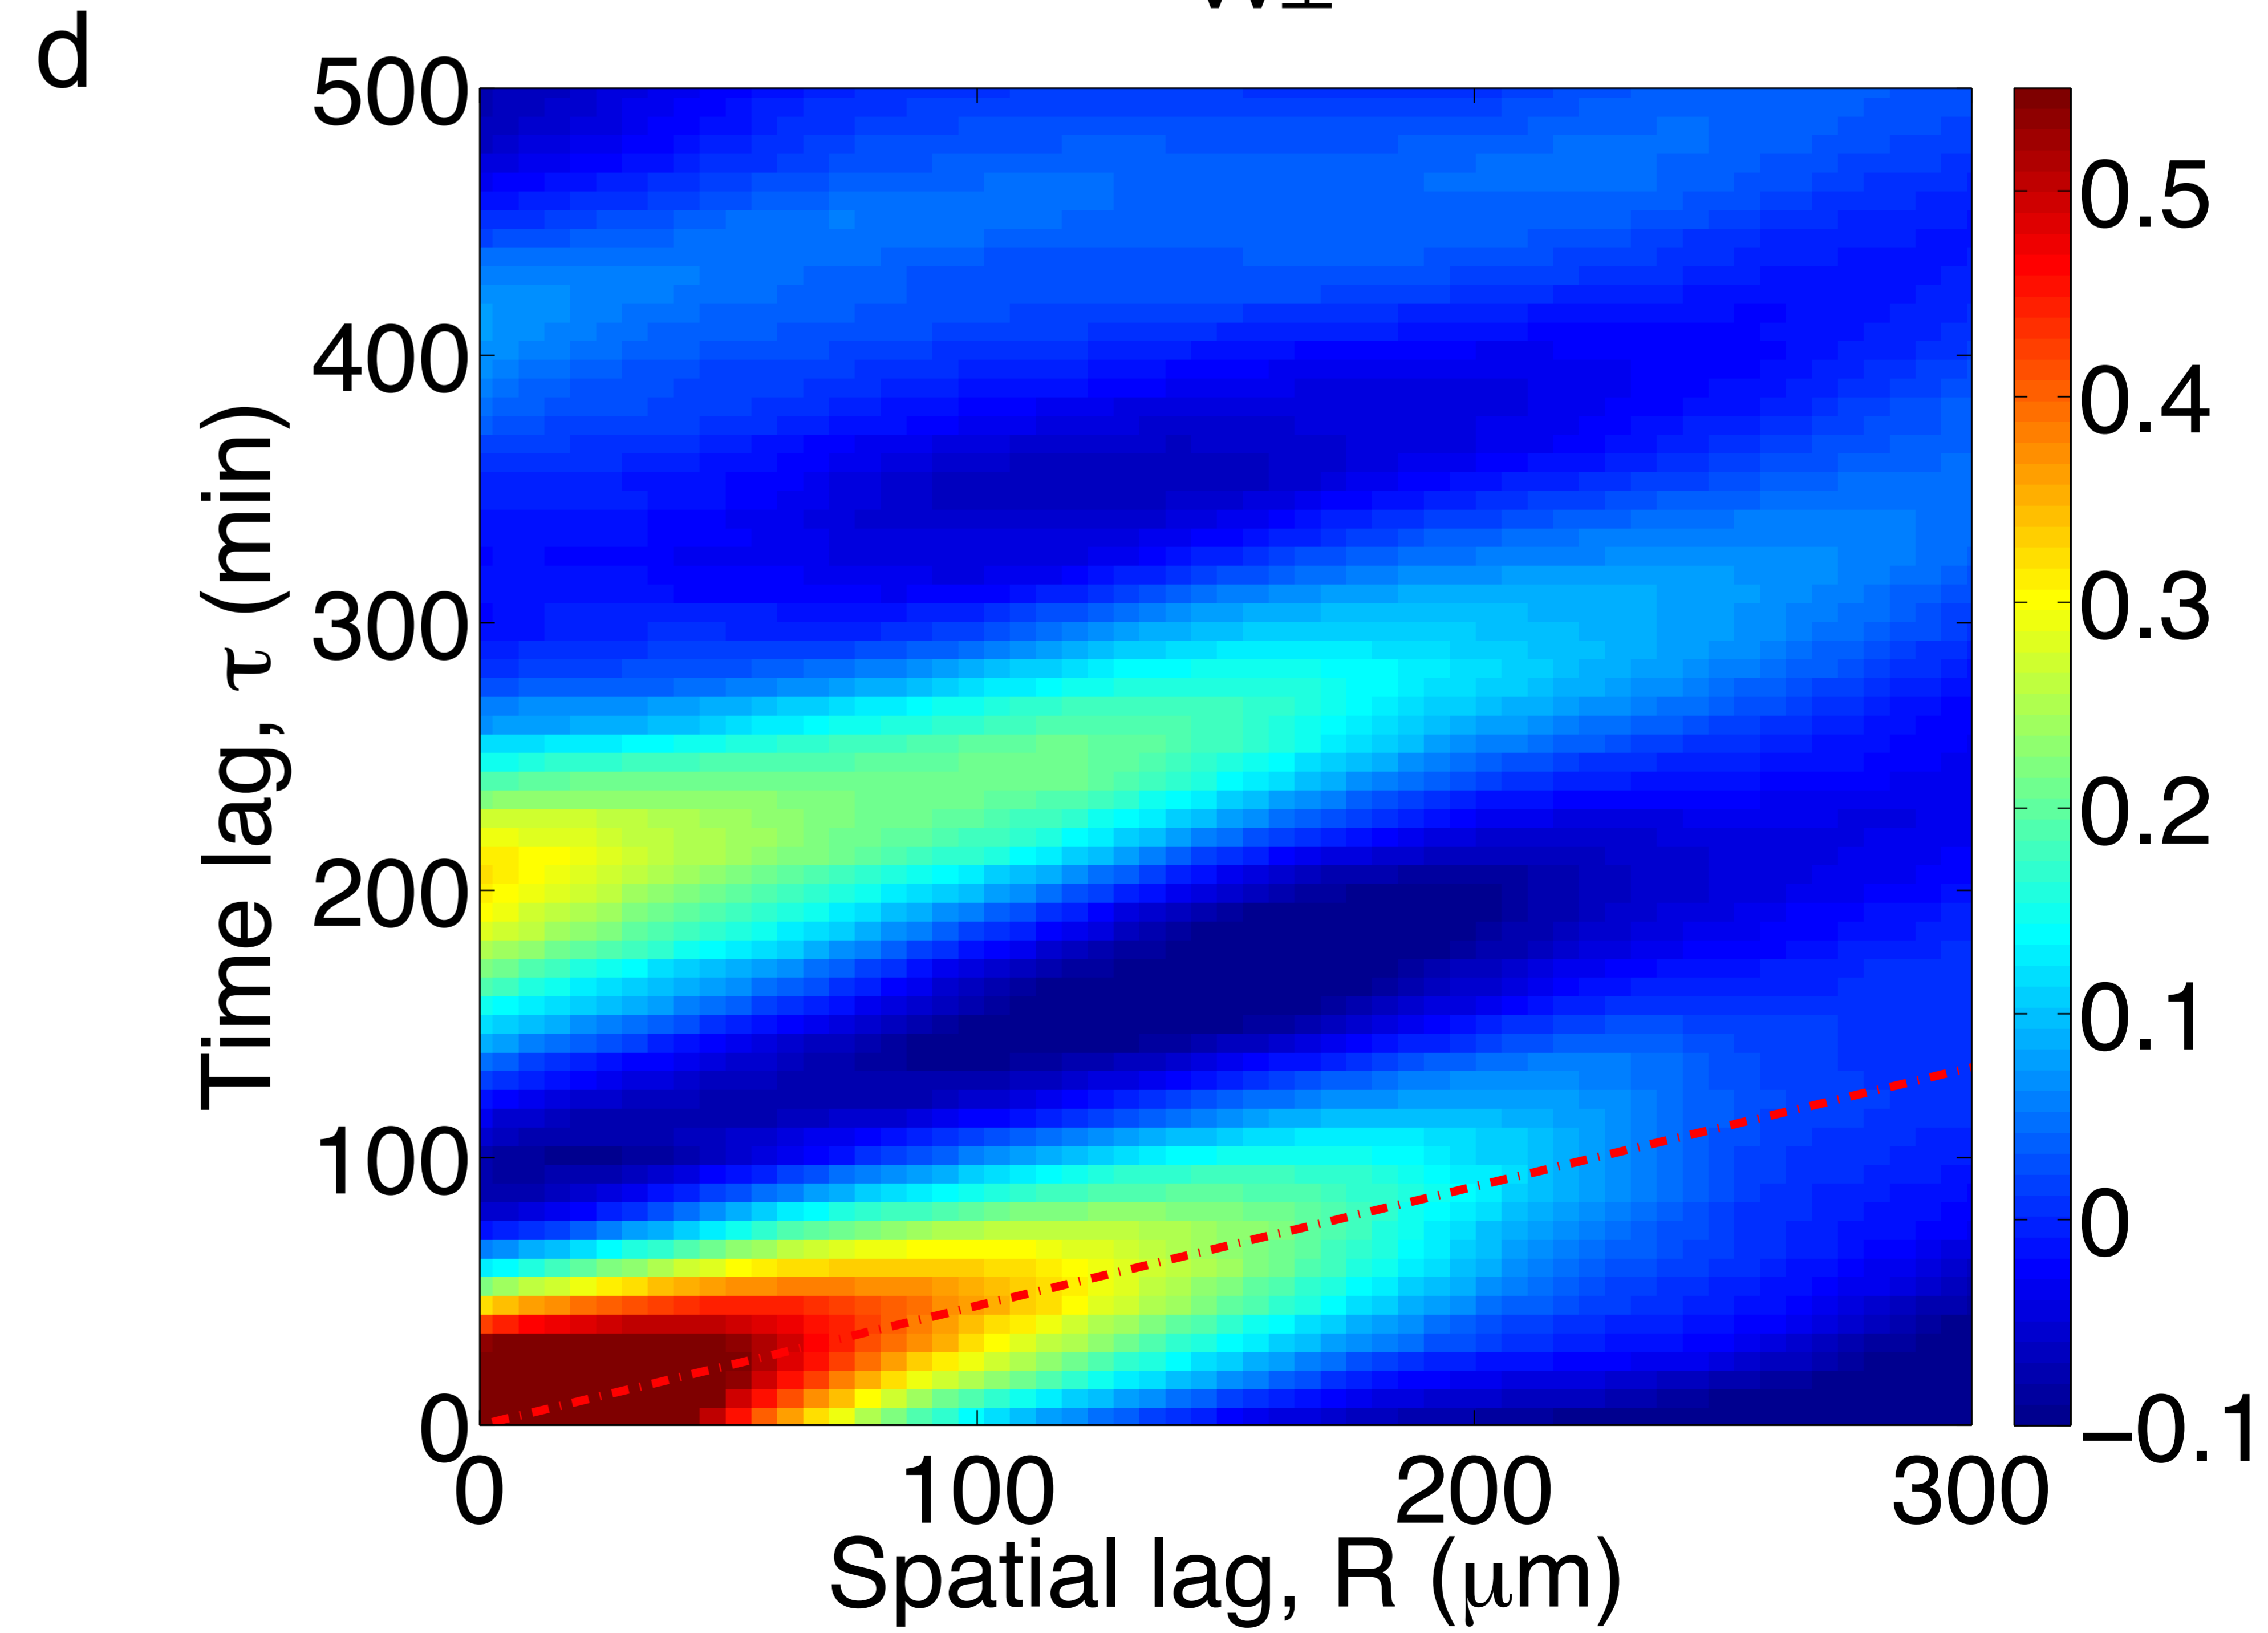

a

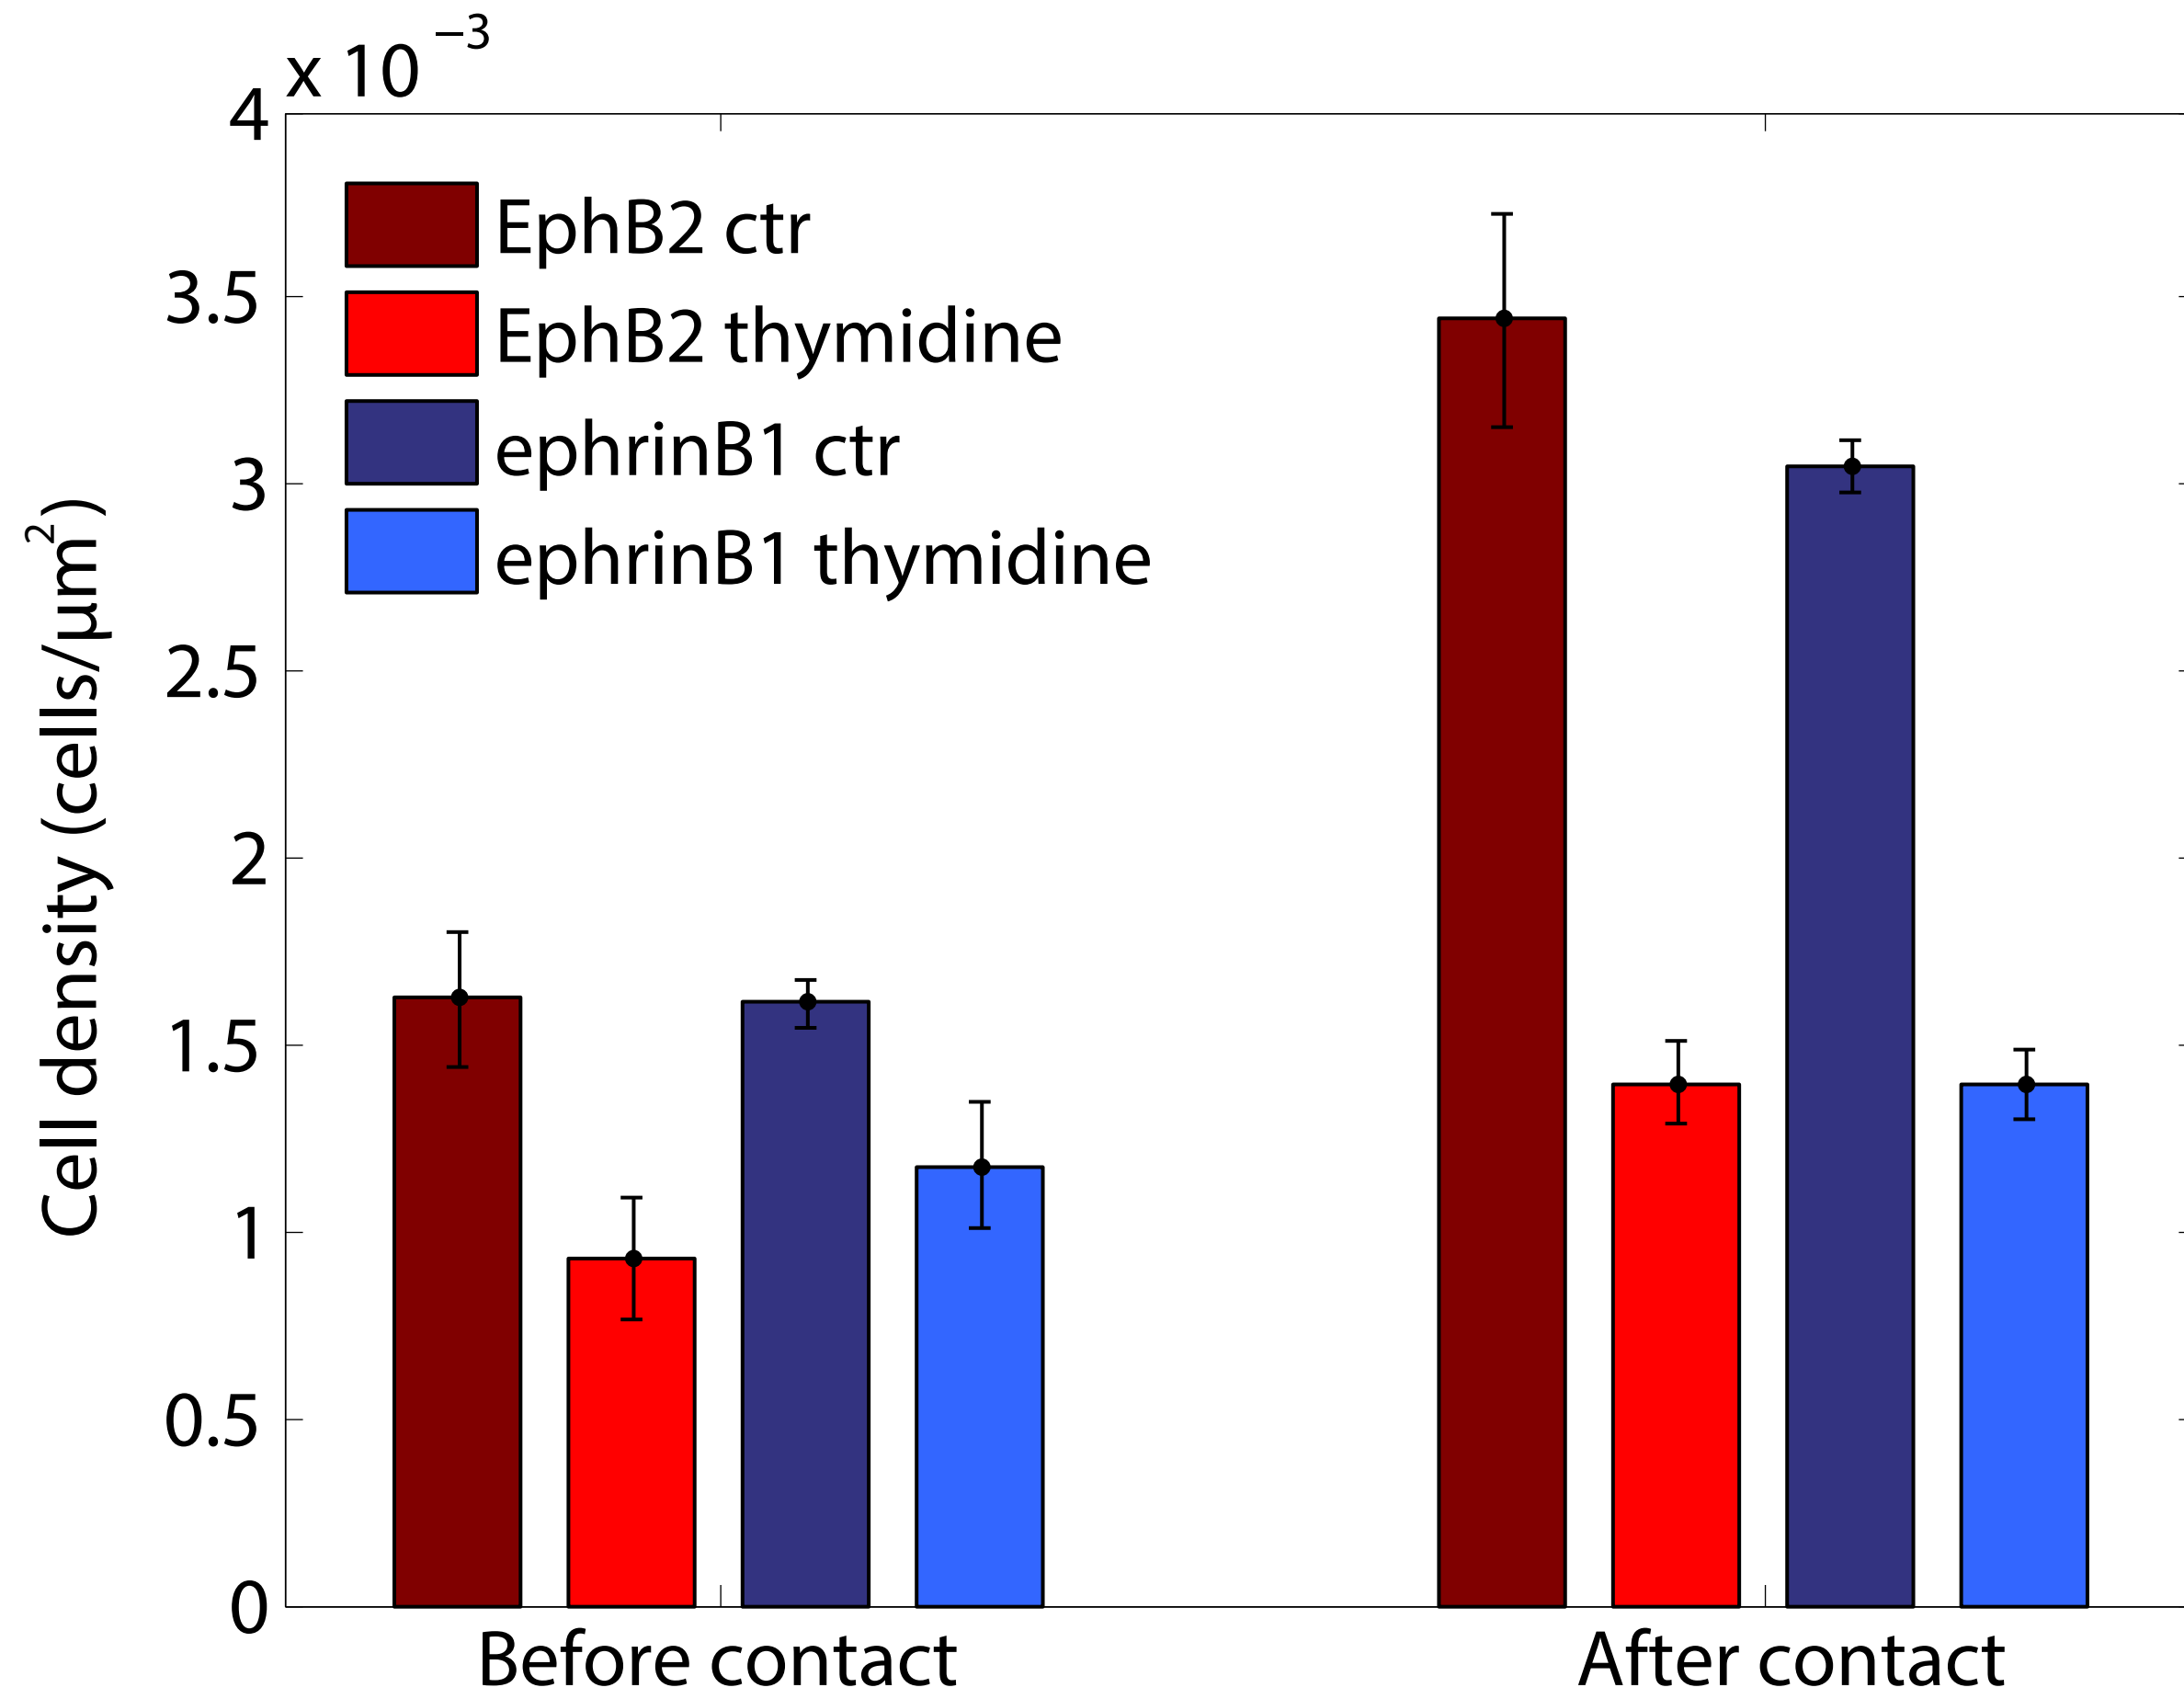

a

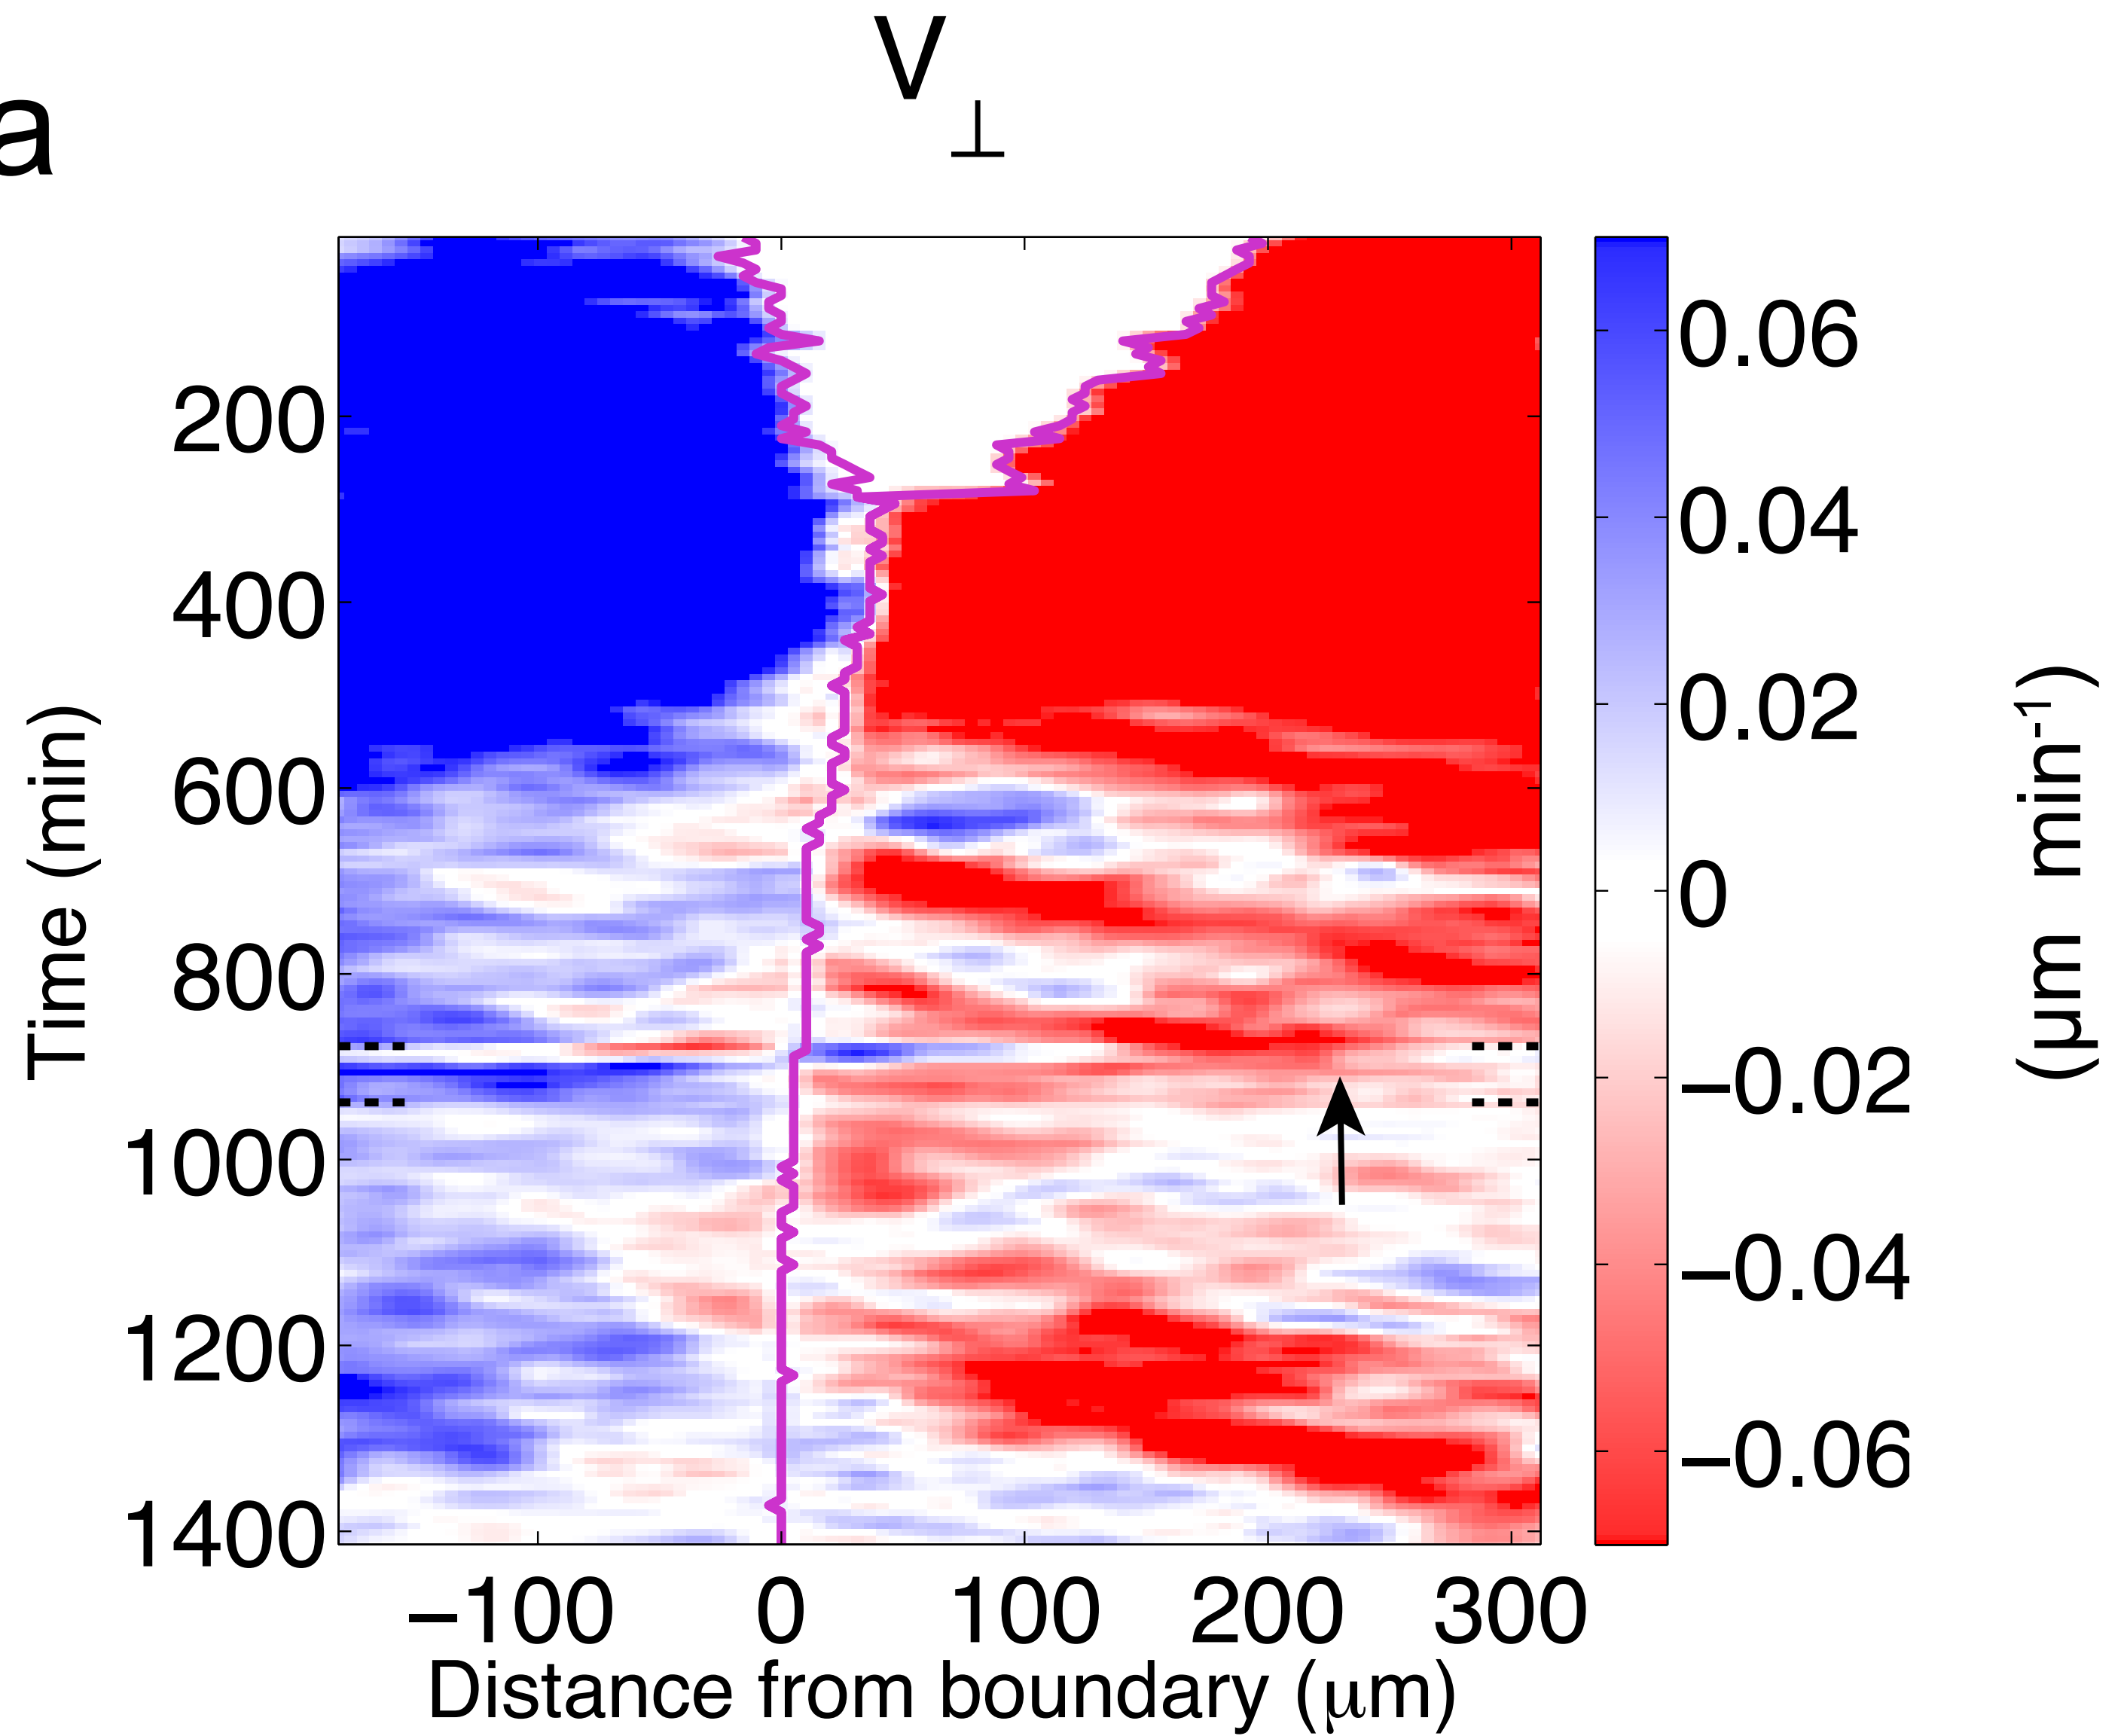

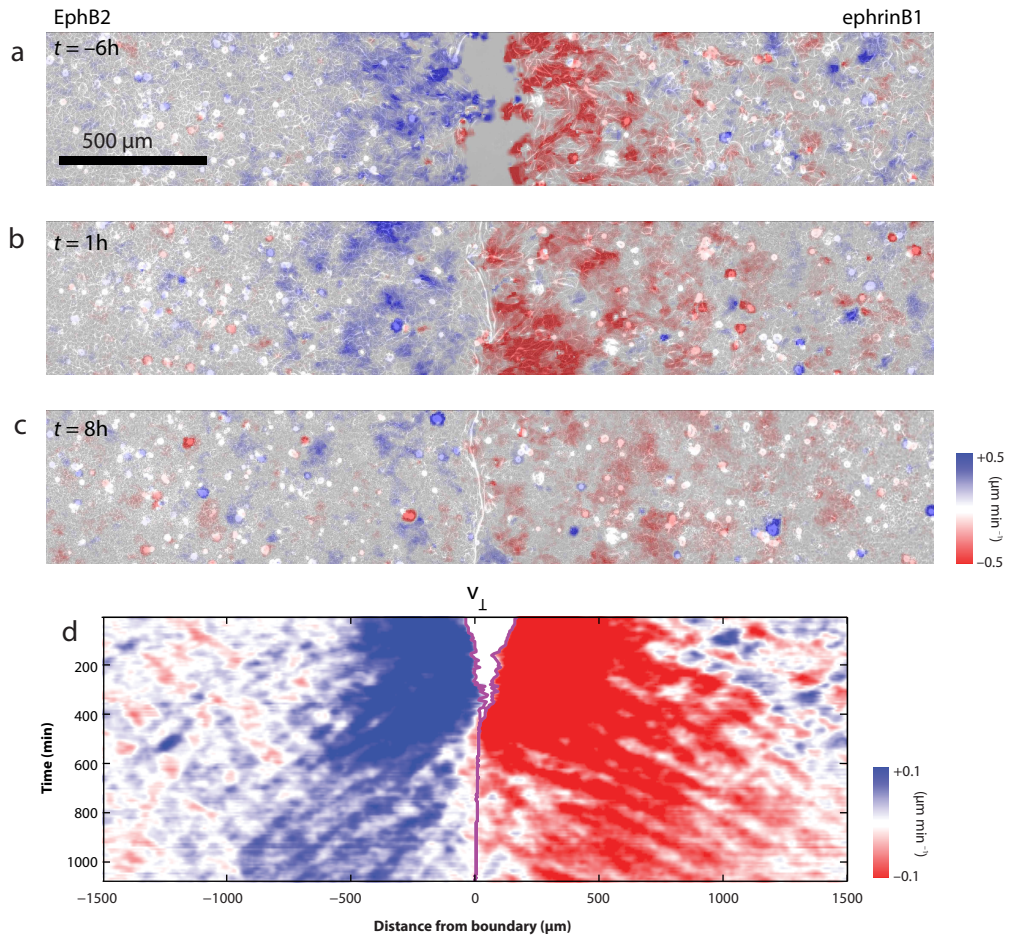

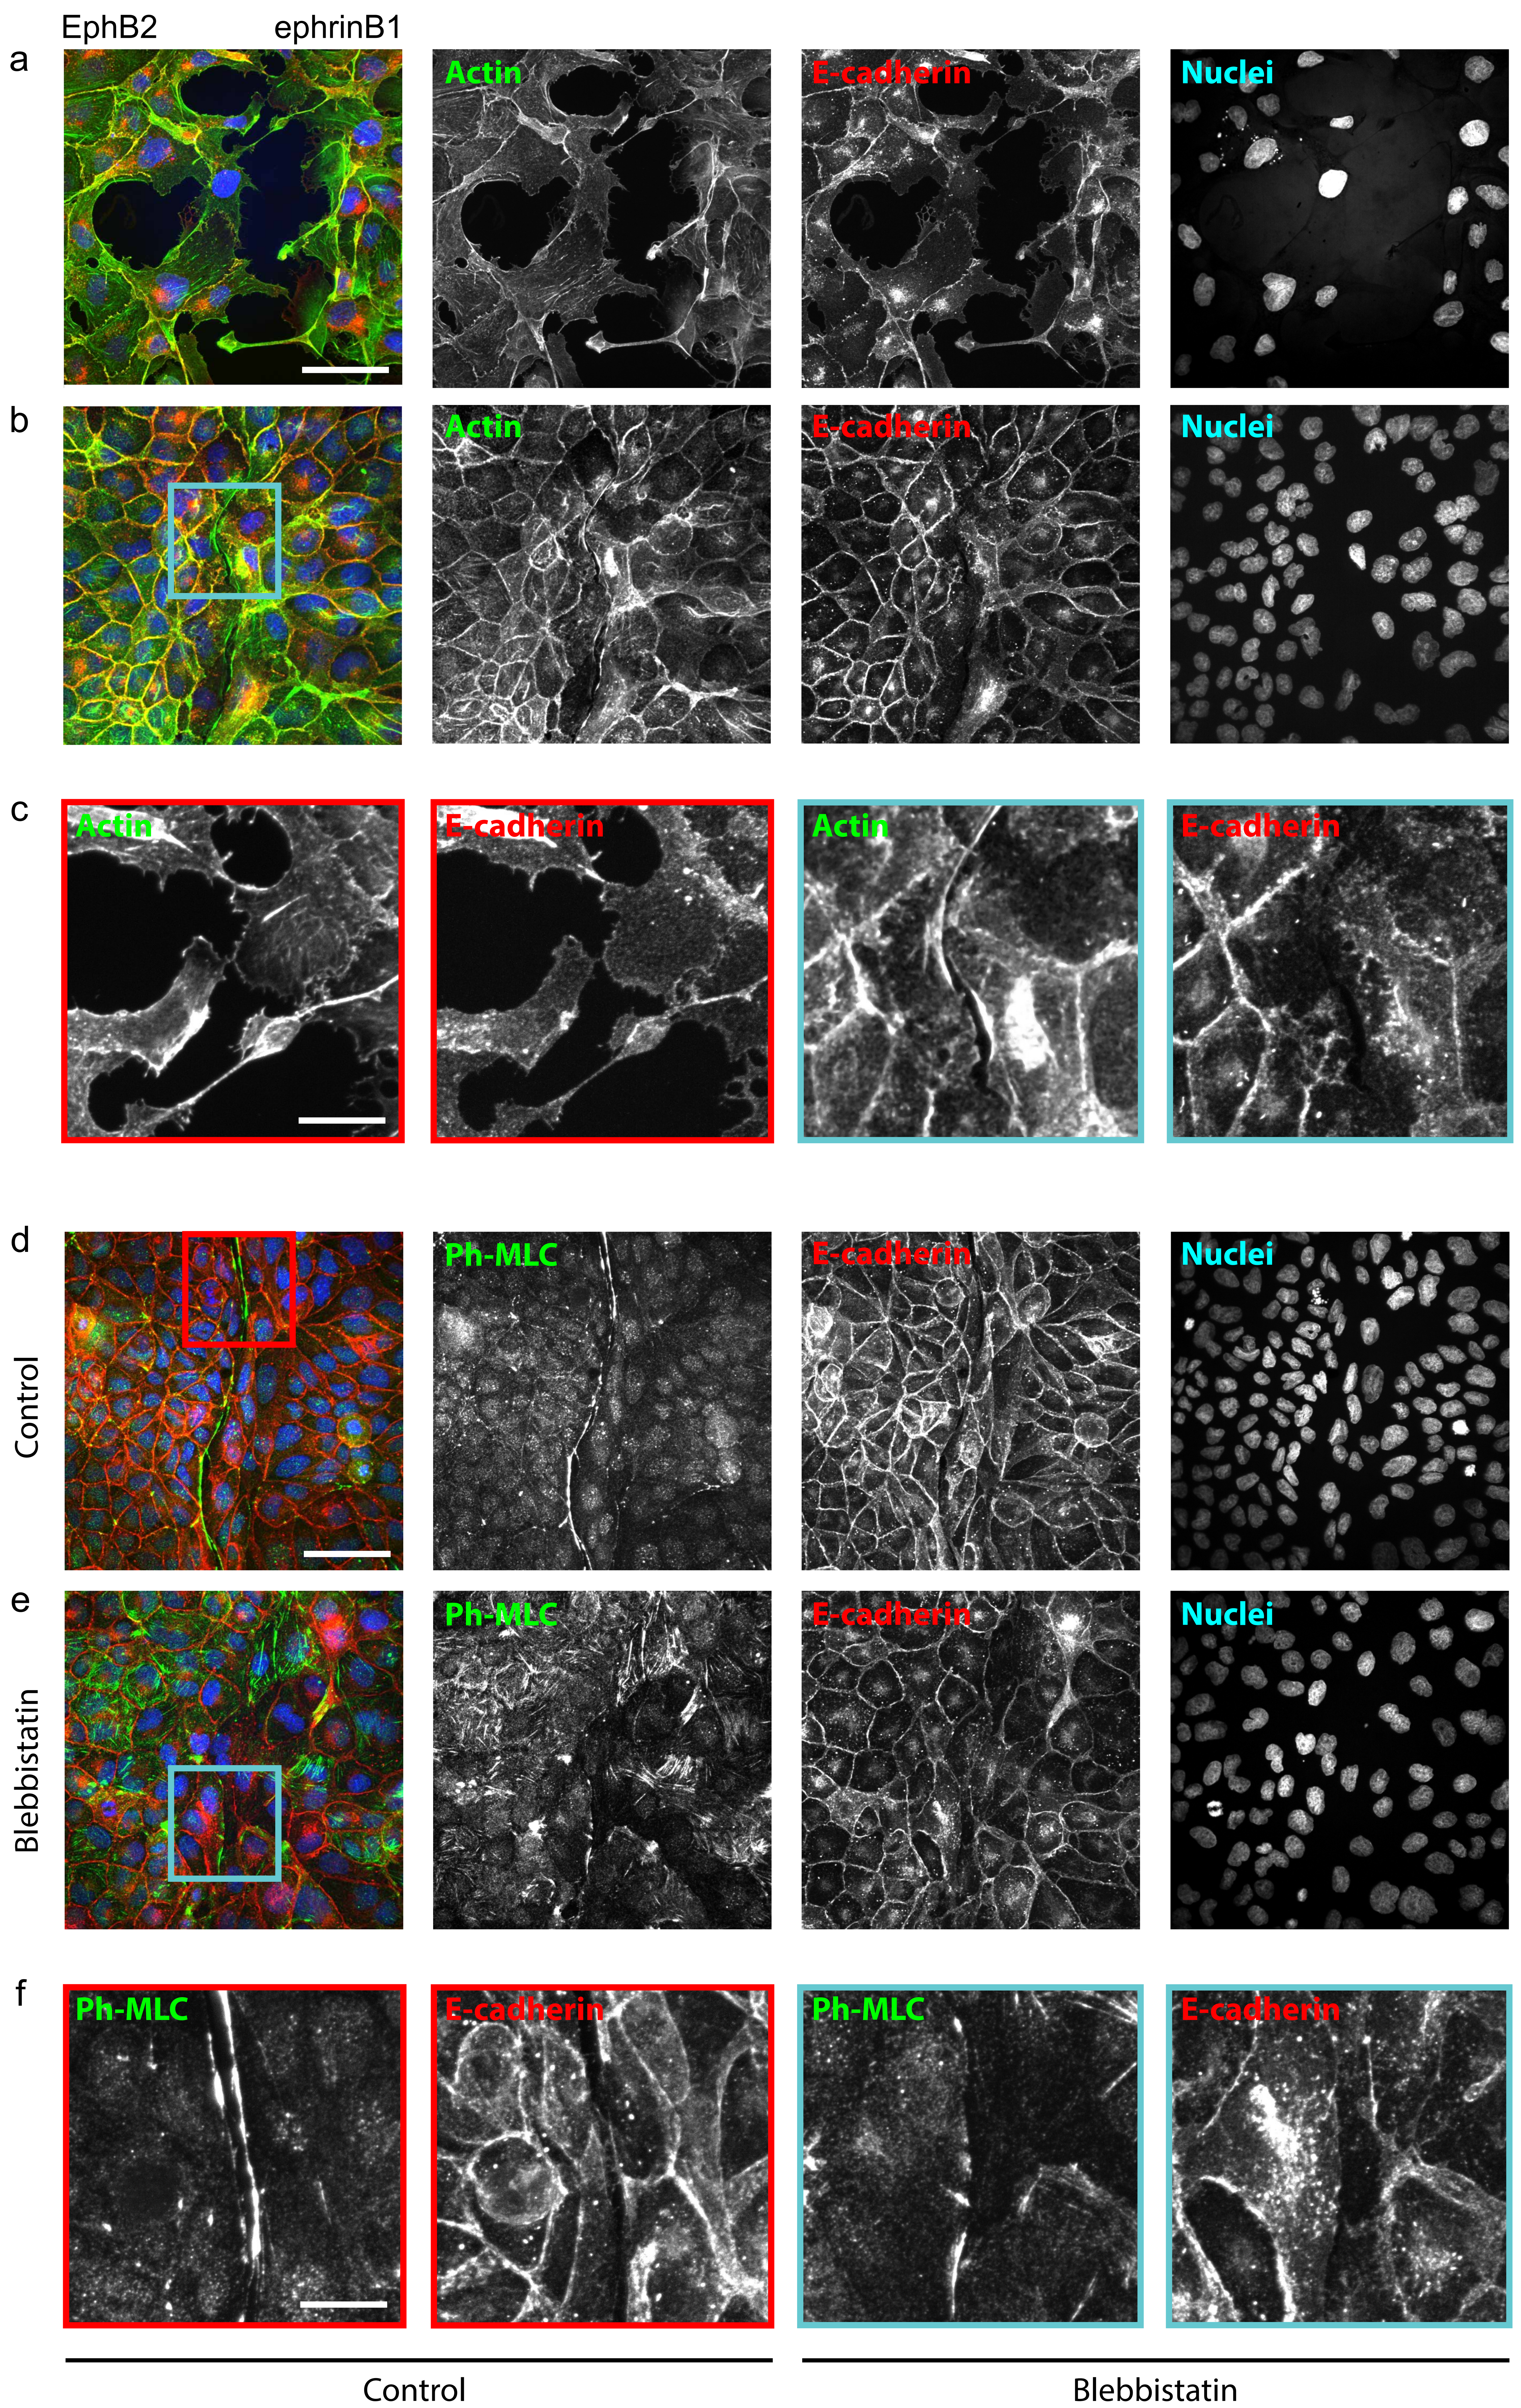



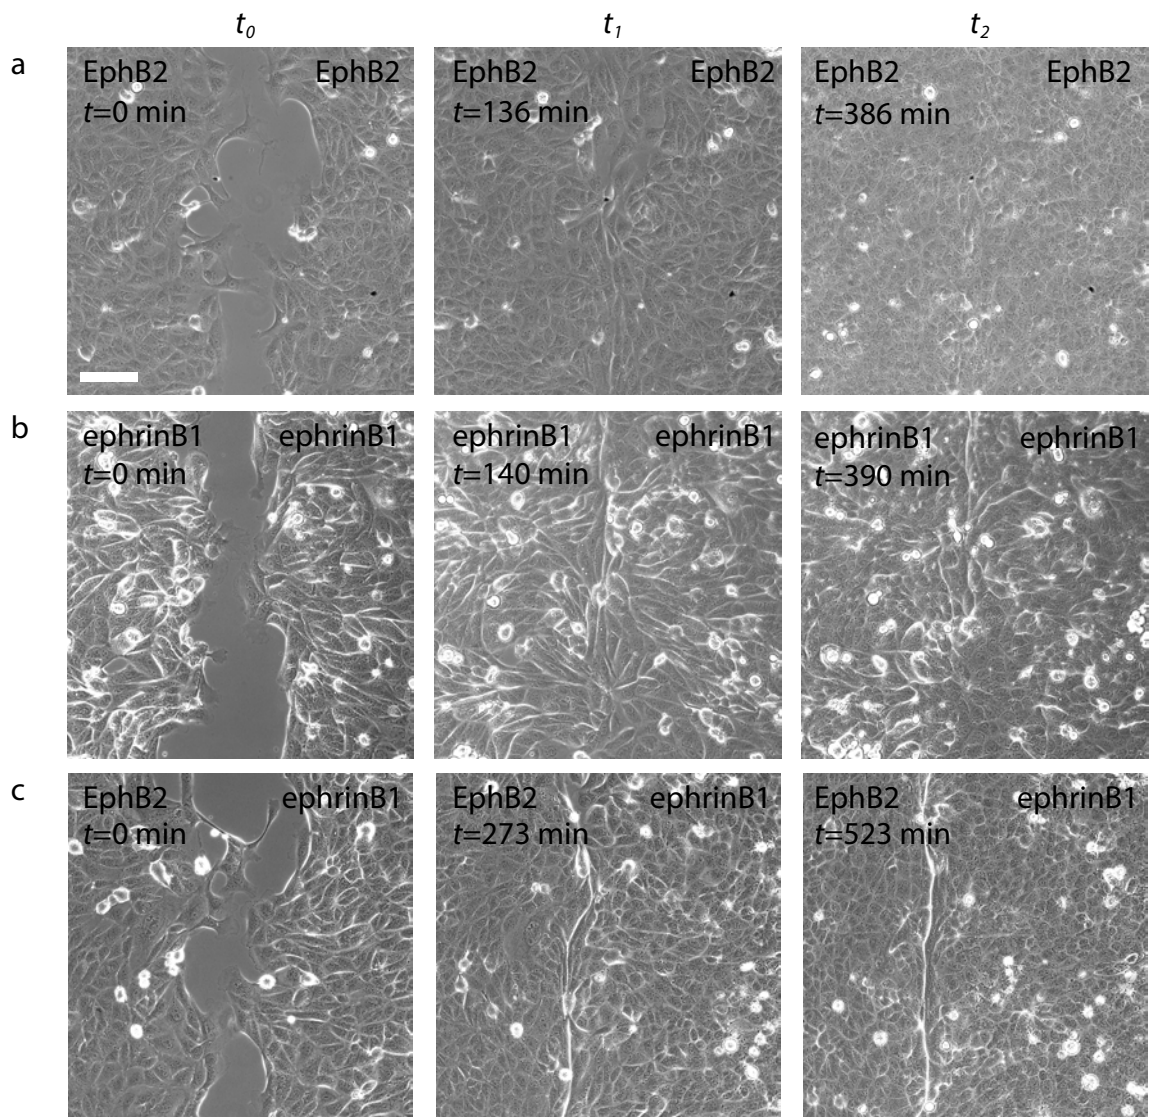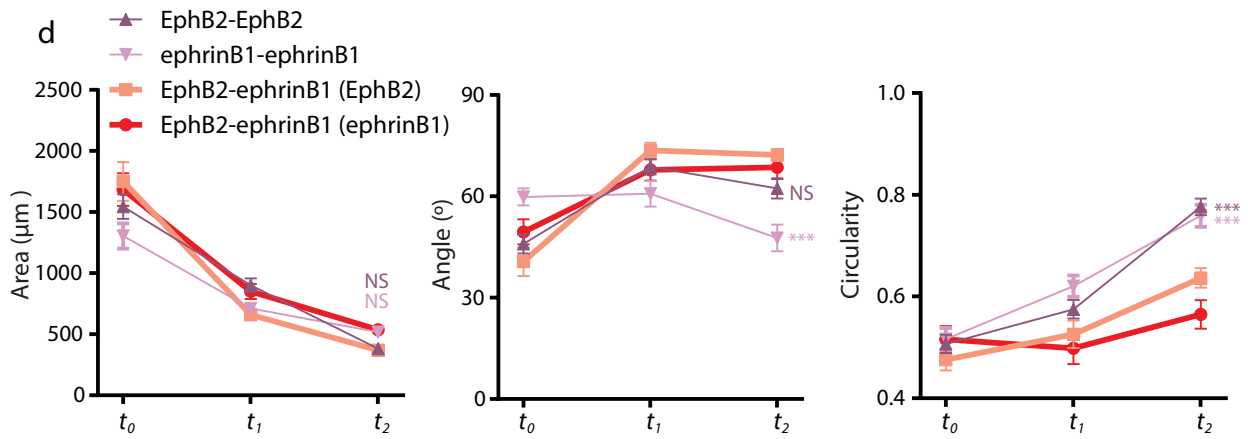

Supplement: NIHMS887442-supplement-Suppl_Figure.pdf [file NIHMS887442-supplement-Suppl_Figure.pdf]
